1 **Practical considerations in the use of a porcine model (*Sus scrofa domestica*) to**  
2 **assess prevention of postoperative peritubal adhesions**

3

4 **Porcine model to assess prevention of postoperative peritubal adhesions**

5

6

7

8 Claudio Peixoto Crispi Jr<sup>1,2¶</sup>, Claudio Peixoto Crispi<sup>1,2&</sup>, Fernando Luis Fernandes Mendes<sup>3¶</sup>, Claudio  
9 Moura de Andrade Jr<sup>1&</sup>, Leon Cardeman<sup>4&</sup>, Nilton de Nadai Filho<sup>1,2&</sup>, Elyzabeth Avvad Portari<sup>5&</sup>, Marlon  
10 de Freitas Fonseca<sup>5¶</sup>

11

12

13

14 <sup>1</sup>Surgical Training Center, SUPREMA University, Juiz de Fora, Minas Gerais, Brazil

15

16 <sup>2</sup>Crispi Institute of Minimally Invasive Surgery, Rio de Janeiro, Rio de Janeiro, Brazil

17

18 <sup>3</sup>Department of Surgery and Anesthesia, College of Veterinary Medicine, UNIFESO University,  
19 Teresópolis, Rio de Janeiro, Brazil

20

21 <sup>4</sup>Leon Cardeman Laboratory of Cytopathology, Rio de Janeiro, Rio de Janeiro, Brazil

22

23 <sup>5</sup>Department of Women's Health, Fernandes Figueira National Institute for Women, Children and Youth  
24 Health, Oswaldo Cruz Foundation, Rio de Janeiro, Rio de Janeiro, Brazil

25

26

27

28 \*Corresponding author:

29 E-mail: [claudin.jr@gmail.com](mailto:claudin.jr@gmail.com) (CPCJr)

30

31 Disclosure statement: The authors declare that they have no conflicts of interest and nothing to disclose.

32

33 ¶These authors contributed equally to this work.

34 &These authors also contributed equally to this work.

35

36

37 **ABSTRACT**

38 Infertility has been a common postoperative problem caused by peritoneal adhesions. Since several  
39 prophylactic agents have recently shown promising preliminary results, more complete studies comparing  
40 their real efficacy and safety are needed urgently. The aim of this study was to investigate and describe  
41 practical considerations of a porcine model that can be used to assess such prophylactic agents. First, 10  
42 healthy 5½ months old female pigs (24.3 - 31.3 Kg) underwent a standardized laparoscopy to provoke  
43 peritubal adhesion formation without prophylactic agents. After 30 days, a second-look laparoscopy was  
44 performed to evaluate adhesions and perform adnexectomy for histopathological evaluation. Adhesions  
45 at different sites were classified by grade, for which the scores range from 0 (no adhesion) to 3 (very  
46 strong vascularized adhesions), and also by area, with scores ranging from 0 (no adhesion) to 4 (>75% of  
47 the injured area). The histopathological evaluation of the distal uterine horns, oviducts and ovaries were  
48 compared with those from a control group of six healthy pigs with no previous surgery. Biological samples  
49 were collected to assess vitality, inflammation and renal, hepatic and hematopoietic systems. There were  
50 small (but significant) changes in serum albumin (P=0.07), globulin (P=0.07), C-reactive protein  
51 (P=0.011), fibrinogen (P=0.023) and bilirubin (P<0.01) after 30 days, but all values were within the normal  
52 range. No inflammation or abscess formation was observed, but different degrees of adhesion were  
53 identified. The estimated occurrence of adhesion (scores >0) and of strong / very strong adhesion (scores  
54 >1) was 75% (95% CI: 55 – 94.9) and 65% (95% CI: 45 – 85), respectively. The porcine model represents  
55 a useful animal platform that can be used to test the efficacy and safety of candidate prophylactic agents  
56 intended to prevent postoperative peritubal adhesions formation. We present several practical  
57 considerations and measures that can help to minimize animal suffering and avoid problems during such  
58 experiments.

59  
60  
61  
62  
63

## 64 Introduction

65

66 Abdominal intraperitoneal postoperative adhesions are fibrous bands that span two or more  
67 organs or the inner abdominal wall. Such adhesions usually develop as a consequence of the healing  
68 process in peritoneum that was injured during surgery, regardless of the surgical approach [1].

69

70 Perioperative and postoperative complications of adhesions include accidental abdominal viscera  
71 injuries (when a new laparoscopic puncture is made), longer duration of subsequent surgeries, chronic  
72 abdominopelvic pain, and intestinal obstruction [2]. In women, adhesions also can impair fertility by  
73 distorting adnexal anatomy and interfering with gamete and embryo transport [3]. As a result of concern  
74 about such complications, the number of publications about surgical adhesions has grown year after year,  
75 with considerable interest in recent years in novel prophylactic agents and methods that have shown  
76 intriguing promise [4,5,6,7,8,9].

77

78 Although body mass index (BMI) and several preoperative inflammatory blood biomarkers have  
79 emerged as potential predictors of post-operative abdominal adhesion formation [2], recent reviews  
80 emphasize their shortcomings and affirm that optimal approaches to adhesion formation prevention still  
81 elude us. Several articles have suggested priorities for future research. Future studies, these authors  
82 say, should consider how adhesion prophylaxis can preserve fertility, include assessments of the safety  
83 of the prophylactic agents, assess adhesions in a uniform or standardized way, and present complete  
84 statistical analyses [10,11]. The authors also call for non-industry funding so that the research is untainted  
85 by pharmaceutical manufacturers' financial support [10,12].

86

87 Since more complete studies assessing the effectiveness and safety of adhesion prophylactic  
88 agents are necessary [9,13], the search for a safe, efficient, and easy-to-use method of adhesion  
89 prophylaxis starts by determining a qualified animal model [7]. Before assessing prophylactic agents and  
90 methods in humans, controlled experiments to evaluate the efficacy of prophylactic products in animal  
91 models have usually followed a simple methodology. First, a standardized surgical injury (able to provoke  
92 adhesion formation) is performed and, after randomization, the tested agent or a control substance is  
93 applied. Then, after a period of time long enough to form adhesions, the two groups are compared in  
94 relation to adhesion formation. Although most animal studies of postsurgical adhesions have used small  
95 animals (i.e. rats and rabbits) due to practical considerations [13], some research groups have elected to  
96 use porcine models because of their known efficiency – especially under laparoscopic conditions – and  
97 the potential to test prophylactic agents in more realistic conditions [14,15,16].

98

99           In this study, we sought to describe some major aspects of a porcine model used to assess  
100 postoperative peritubal adhesion formation, including the expected incidence of adhesions, the  
101 histopathological characteristics of the uterine horn, and the baseline values and natural changes in  
102 several biomarkers that are observed 30 days after a standardized peritubal tissue injury triggered by  
103 laparoscopy when no prophylactic agent was used.

104

## 105 **Materials and Methods**

### 106 **Design and team**

107

108           This experimental study was carried out through a partnership of three institutions: the Crispi  
109 Institute for Minimally Invasive Surgery ([www.institutocrispi.com.br](http://www.institutocrispi.com.br)), the Suprema Faculty of Medical  
110 Sciences and Health of Juiz de Fora ([www.suprema.edu.br](http://www.suprema.edu.br)), and the Research and Education Center for  
111 Phototherapy in Health Sciences ([www.nupen.com.br](http://www.nupen.com.br)). In order to establish a detailed protocol that also  
112 highlights various types of possible pitfalls or operational difficulties in future experiments, an  
113 interdisciplinary approach was used throughout the elaboration of this work. Thus, the planning and  
114 execution of this study included the participation of specialists from different areas: anesthesiology,  
115 gynecology, veterinary medicine, proctology, urology, clinical pathology, surgical nursing, quantitative  
116 methods and clinical laboratory analysis.

117

### 118 **Ethical statement**

119

120           This experimental study was carried out at the Suprema Surgical Training Center (Juiz de Fora,  
121 Minas Gerais, Brazil) in strict accordance with the Guide for the Care and Use of Laboratory Animals of  
122 the National Research Ethics Commission of the Brazilian Ministry of Health and the recommendations of  
123 the National Centre for the Replacement, Refinement and Reduction of Animals in Research (London,  
124 United Kingdom). In order to maximize reproducibility and the potential for the re-use of data, we also  
125 followed the Animal Research: Reporting of *In Vivo* Experiments (ARRIVE) Guidelines [17].

126

127           The protocol was approved by the Institutional Animal Care and Use Committee (CEUA -  
128 Suprema; Protocol Number 004/2017). Besides the health certificate issued by a veterinarian provided by  
129 the supplier (Fazenda Penalva, Juiz de Fora, MG), the veterinarian responsible for the study (F.L.F.M.)  
130 clinically evaluated all the animals before and during this study.

131

132           In order to optimize the sample size, we considered as realistic an experimental model in which  
133 adhesion formation would occur in 90% rather than all of the animals [10,18,19,20]. Assuming a 20%

134 error, and using the formula  $N = 1,96^2 \times P(1 - P) / D^2$ , where N is the minimum sample size, P is the  
135 expected prevalence and D is the maximum accepted error, we calculated 8.6 as the minimum number of  
136 animals necessary to estimate the incidence of adhesions. Thus, this study included 10 animals.

137

## 138 **Animals and procedures**

139

140 The study was carried out in two phases; the same two surgeons performed all surgeries. In the  
141 first phase, 10 healthy 5½ month-old female pigs (*Sus scrofa domesticus*; crossbreed Large White)  
142 underwent laparoscopy to execute standardized bilateral pelvic injuries in order to provoke the formation  
143 of peritubal adhesions. In the second phase, 30 days later, a “second-look” laparoscopy was performed  
144 to classify and quantify the peritoneal adhesions, and to perform adnexectomy for histopathological  
145 examination of the distal uterine horn, including ovaries and oviducts. The animals were then euthanized.

146

147 The animals, which had fasted for 12 hours, were premedicated with an admixture of midazolam  
148 (0.5mg/kg) + atropine (0.04 mg/kg) + ketamine (2 mg/Kg) + acepromazine (0.1 mg/Kg) – administered as  
149 a single intramuscular injection. General inhalation anesthesia was then induced with a swine-specific  
150 mask and maintained (after oral intubation) with isoflurane (1.5 - 2.5 vol.%) in oxygen (flow rate: 2 L/min).  
151 Monitoring instruments during anesthesia included pulse oximeter with plethysmograph, rectal  
152 thermometer and sphygmomanometer. The total perioperative hydration was standardized as intravenous  
153 infusion of 500 mL of sodium chloride 0.9%.

154

155 In the first phase (peritubal injury), the laparoscopic surgeries were performed in the evening  
156 between 5 pm and 11 pm on consecutive days (two campaigns). When the animal was adequately  
157 anesthetized, the abdominal region was scrubbed with warm water, shaved, and disinfected; thus the  
158 laparoscopic injury was performed in aseptic conditions. The ambient temperature of the operating suite  
159 was maintained between 21°C and 23°C. Immediately after orotracheal intubation, the veterinary  
160 anesthesiologist administered intramuscular Enrofloxacin 10% (2.5 mg/Kg) for antibiotic prophylaxis and  
161 Meloxicam 2% (0.4 mg/Kg) for preemptive analgesia. The pharmacological strategy for postoperative  
162 analgesia also included infiltration of a long-lasting local anesthetic into laparoscopic punctures at the end  
163 of surgery (detailed below).

164

165 The second-look surgery followed the same protocol, except for the postoperative analgesia,  
166 antibiotic prophylaxis and aseptic conditions.

167

## 168 **Laparoscopic protocol to form peritubal adhesions**

169

170           Given the frequent difficulties and complications experienced using other techniques to perform  
171 the first puncture in pigs, our group considers and recommends the Veress needle technique as the best  
172 method to establish the pneumoperitoneum in these animals. In this study, after the first 11 mm trocar  
173 was inserted through a small incision in the umbilical scar, three accessory 5 mm trocars were inserted as  
174 illustrated in **Figure 1A**.

175  
176 **Figure 1.** Schematic illustration of trocar placement in the porcine model (**A**) and the regions of interest to  
177 calculate the Peritoneal Adhesion Index (**B**), which is the sum of the grade scores in all regions (Adapted  
178 from Coccolini et al., 2013) [21].

179  
180           During laparoscopy, the animals were placed in Trendelenburg position, the carbon dioxide  
181 pressure was set in 10 mmHg with high flow insufflation for the maintenance of the pneumoperitoneum,  
182 and the surgery was performed as usually done in humans [22]. After a careful inventory of the entire  
183 abdominal and pelvic cavity in order to exclude naturally formed adhesions (**Figure 2A-B**), the first step of  
184 the injury was a laparoscopic suture in distal segment of the uterine horn with Polyglactin 910 (Coated  
185 Vicryl® 2.0 ½ circle 31 mm, Ethicon) by introducing the needle into the broad ligament (**Figure 2C**) and  
186 performing a knot wrapping the entire circumference of uterine horn, similar to the Pomeroy technique  
187 (**Figure 2D**). Then, a small portion of the uterine horn (about 1 cm) was excised at a distal site close to  
188 the utero-tubal junction with a laparoscopic scissors (**Figure 2E-F**). Subsequently, in order to favor the  
189 peritubal adhesions formation, we performed bilateral excisions of an 8 cm × 10 cm area of the  
190 peritoneum of the pelvic sidewall located opposite the left and right uterine horns using both laparoscopic  
191 scissors and blunt dissection until the musculature was totally exposed (**Figure 2G-H**). Finally, a similar  
192 area of peritoneum was excised at the anterior wall below the umbilical scar, up to (but not reaching) the  
193 bladder. Rather than energy, only surgical gauze was used for hemostasis in all sites.

194  
195 **Figure 2.** Laparoscopic protocol to form peritubal adhesions: panoramic view during inventory of the  
196 cavity (**A**); identification of the ovary and oviduct (**B**); laparoscopic suture in the uterine horn (**C**); knot  
197 wrapping the entire circumference of uterine horn (**D**); excision of a small portion of uterine horn (**E**);  
198 panoramic view of injured uterine horn (**F**); excision of about 80 cm<sup>2</sup> of peritoneum on the pelvic sidewall  
199 (**G**); panoramic view at the end of peritubal injury (**H**). The protocol was performed bilaterally.

200  
201           After the surgery was completed, in order to improve the postoperative analgesia [23,24], the  
202 surgeon injected 0.5% bupivacaine around each laparoscopic puncture: 2 mL in the site where the 11 mm  
203 trocar had been inserted, and 1 mL in the 3 other sites where the 5 mm trocars were placed. As young  
204 pigs have a relatively thin abdominal wall, these injections were made with a delicate needle (16 x 4.5  
205 mm) in order to minimize the risk of drilling intra-abdominal structures.

206

## 207 **Postoperative care**

208

209           After the first surgery (injury), the animals were allocated in groups of 3 or 4 animals in an  
210 infirmary housing, where they received care for 30 days in boxes of approximately 8 m<sup>2</sup> with a fenestrated  
211 bottom, built specifically for this purpose. The animals were fed a special ration for pigs (500 g / day /  
212 animal during the first 2 weeks; 600 g / day / animal afterwards) and oral hydration (*ad libitum*) by an  
213 automatic system with water from the public network. After surgery, a veterinarian examined the animals  
214 three times a day during the first week, and the basic care included not only a veterinary topical  
215 antiseptic, but also regular analgesia with intramuscular Meloxicam (4 days) and daily antibiotic  
216 prophylaxis with Enrofloxacin for one week. The animals were cared for by a caregiver under the  
217 supervision of the veterinarian until the "second-look" surgery. The main objective of this observance was  
218 to respond promptly to eventual clinical interurrences and provide immediate diagnosis, specific  
219 treatment, and necropsy in case of death (none occurred). During the 30 days post-operative care, the  
220 temperature and humidity inside the housing was checked three times a day and ranged, respectively,  
221 between 16°C and 28°C (median 22°C) and between 60% and 99% (median 86%).

222

## 223 **Second look and assessment of peritubal adhesions**

224

225           In this study, rather than necropsy, the presence of peritoneal adhesions in specific sites was  
226 assessed laparoscopically 30 days post-injury using a standardized classification and quantification  
227 methodology that is based on the macroscopic appearance of adhesions and their distribution in different  
228 regions of the abdomen (**Figure 1B**). The sites were classified using an ordinal variable (on a 0 to 3  
229 scale) derived from the Peritoneal Adhesion Index [21], and also received a score (on a 0 to 4 scale)  
230 based on the ratio of the area of adhesion to the area of injury [13]. The excised area of the peritoneum  
231 (about 8 x 10 cm) was considered the reference area (**Figure 3**) to determine the adhesion area score  
232 (**Table 1**).

233

234           After evaluating adhesion scores under laparoscopic view, the distal uterine horn with oviduct  
235 (infundibulum, ampulla and isthmus) and ovary on each side were laparoscopically removed using an  
236 ultrasonic scalpel in order to minimize bleeding [25]. The harvested specimens were fixed in 10% neutral  
237 buffered formalin solution, and then embedded in paraffin, sectioned, and stained with hematoxylin-eosin  
238 for evaluation by a single experienced pathologist (L.C.). The histopathological assessment of the distal  
239 uterine horns, oviducts and ovaries from the ten 6½ month-old previously injured pigs were compared  
240 with those of a control group composed of six healthy 5½ months old pigs with no history of surgery, with  
241 a focus on the injury repair response and naturally occurring changes from 5½ to 6½ months.

242

243           Upon conclusion of the second look laparoscopy, all the animals were euthanized by deep  
244 anesthesia followed by intravenous administration of 10 mL of 19.1% potassium chloride.

245

## 246 **Sampling to assess toxicologic biomarkers**

247

248           In order to explore the nutritional status, the immune response and the potential late  
249 consequences of surgery on the hematopoietic, renal and hepatic systems, blood samples were obtained  
250 at two moments: before the laparoscopic injury and before the second-look. The samples were collected  
251 systematically after orotracheal intubation by puncture of an animal's ear vein with a 22G peripheral vein  
252 catheter while keeping the animal in dorsal recumbency. Because of difficulties encountered during  
253 preliminary blood specimen collections using Vacutainers, blood collection was performed by dripping  
254 blood from the open catheter directly into uncovered tubes. After filling each tube with the appropriate  
255 volume of blood, the tube was capped and gently shaken to provide contact with the anticoagulant  
256 avoiding coagulation. To ensure consistency, this maneuver was performed with the concurrent  
257 participation of two veterinarians.

258

259           Many disorders can be detected in their early stages by examination of the urine. Urinalysis was  
260 performed as a screening test to detect and/or measure by products of normal and abnormal metabolism  
261 (e.g. glucose, protein, bilirubin, red blood cells, white blood cells, crystals), and bacteria. Urine samples  
262 were systematically collected, but only during the second-look surgery due to concern about the risk of  
263 introducing infections while manipulating the urinary tract of young female pigs. In fact, catheterization of  
264 the bladder to collect the urine specimens proved so challenging, the specimens were obtained by  
265 transdermal suprapubic aspiration under laparoscopic vision using a 25 Gauge 3.5 inches Quincke spinal  
266 needle coupled to a 5 mL syringe. To favor diuresis and ensure 5 mL of urine could be collected at the  
267 end of the second-look surgery, bolus intravenous hydration with 500 mL of 0.9% NaCl solution was  
268 initiated following induction of anesthesia.

269

270           The clinical analysis laboratory responsible for the analysis of study biological specimens is  
271 accredited by the Brazilian Ministry of Agriculture, Livestock and Food Supply (Ministério da Agricultura,  
272 Pecuária e Abastecimento, MAPA) for the analysis of official samples. The laboratory has a quality control  
273 system that complies with NBR ISO 17025 standards; it assesses precision and accuracy daily, and  
274 undergoes external quality control.

275

## 276 **Statistics**



277 The database was managed using Microsoft Office Excel® version 2010 (Microsoft Corp.,  
278 Redmond, WA, USA). Statistics and charts were generated using IBM® SPSS® Statistics Standard Grad  
279 Pack 20 (NY, USA). The statistical results were considered significant when  $P < 0.05$  (2-sided).

280  
281

## 282 **Results**

### 283 **Time spent**

284

285 The time spent with each animal during the first surgery ranged between limits that are  
286 considered acceptable. The median total time between the intramuscular administration of premedication  
287 and the induction of general anesthesia was 13 min (min 7, max 23 min); the median total time of general  
288 anesthesia (from intubation to extubation) was 79 min (min 68, max 104 min); the median total time of  
289 surgery (from the beginning of the first puncture to the last suture) was 50 min (min 32, max 71 min); and  
290 the median total time of pneumoperitoneum was 33 min (min 23, max 64 min).

291

### 292 **Peritubal adhesions after 30 days**

293

294 No inflammation or abscess formation was observed in any of the operated animals whereas  
295 adhesions of varying degrees were identified (**Figure 3**). Due to its proximity to the pelvic sidewall, most  
296 of the adhesions that formed involved the uterine horn, as expected. Only one animal had an adhesion  
297 elsewhere: a bowel wall to bowel wall adhesion. When only the 20 uterine horn sites were considered, the  
298 estimated incidence of any adhesion with a score  $> 0$  was 75% (95% confidence interval: 55 – 94.9) and  
299 the estimated incidence of a strong or very strong adhesion with a score  $> 1$  was 65% (95% confidence  
300 interval: 45 – 85). The raw scores characterizing the postoperative peritoneal adhesions are presented in

301 **Table 1.**

302

303 **Figure 3.** Laparoscopic view of peritubal adhesions in a young female pig during a second-look  
304 laparoscopy that was performed one month after a standardized laparoscopy to provoke adhesion  
305 formation. The yellow dotted line represents the peritoneum area that was removed from the lateral wall  
306 (approximately 80 cm<sup>2</sup>). Both images **a** and **b** exhibit adhesions that were classified as Peritoneal  
307 Adhesion Index raw score 2 (strong adhesions, sharp dissection) according to Coccolini et al., 2013 [21].

308

309 **Table 1.** Postoperative peritoneal adhesions (raw scores) assessed through a second-look laparoscopy  
 310 performed 30 days after standardized bilateral tubal injury and excision of adjacent peritoneum of the  
 311 pelvic sidewall to provoke adhesion formation.  
 312

| <b>Animal</b>           | <b>1</b> | <b>2</b> | <b>3</b> | <b>4</b> | <b>5</b> | <b>6</b> | <b>7</b> | <b>8</b> | <b>9</b> | <b>10</b> |
|-------------------------|----------|----------|----------|----------|----------|----------|----------|----------|----------|-----------|
| <b>Grade</b>            |          |          |          |          |          |          |          |          |          |           |
| Left uterine horn site  | 2        | 2        | 0        | 2        | 2        | 2        | 0        | 2        | 2        | 0         |
| Right uterine horn site | 2        | 2        | 2        | 2        | 0        | 2        | 0        | 1        | 1        | 2         |
| Bowel to bowel          | 0        | 2        | 0        | 0        | 0        | 0        | 0        | 0        | 0        | 0         |
| PAI                     | 4        | 6        | 2        | 4        | 2        | 4        | 0        | 3        | 3        | 2         |
| <b>Area</b>             |          |          |          |          |          |          |          |          |          |           |
| Left uterine horn site  | 1        | 1        | 0        | 3        | 1        | 2        | 0        | 2        | 1        | 0         |
| Right uterine horn site | 1        | 1        | 1        | 1        | 0        | 1        | 0        | 1        | 1        | 1         |

313  
 314  
 315 PAI (Peritoneal Adhesion Index) is the sum of the raw scores in all regions (Adapted from Coccolini et al.,  
 316 2013) [21]: 0 No adhesions; 1 Filmy adhesions, blunt dissection; 2 Strong adhesions, sharp dissection; 3  
 317 Very strong vascularized adhesions, sharp dissection, damage hardly preventable. Area scores  
 318 (adhesion area / injured area ratio): 0 (no adhesion); 1 ( $\leq 25\%$  of initial injured area); 2 ( $>25\%$  and  $<50\%$ )

319 of initial injured area); 3 (50% - 75% of initial injured area) or 4 (>75% of initial injured area) [13]. The  
320 excised area of the sidewall peritoneum adjacent to each uterine horn was considered as a reference  
321 injured area (about 8 x 10 cm). Sites with no adhesions in all ten animals (all scores = 0) were not  
322 included in this table. The animals were numbered in order according the time of the first surgery (injury).

323

## 324 **Histopathological observations**

325

326 Despite being somewhat heterogeneous, the histological findings in all assessed uterine horns  
327 (including the oviduct, ovary and uterus) may be considered consistent with an inflammatory response  
328 during the natural healing process evoked by the injuries performed 30 days earlier.

329

330 In swine, as in other mammals, the histology of the ovary – both its outer cortex and inner  
331 medulla – varies with the age and phase of the sexual cycle. The surface of the pigs' ovaries is covered  
332 by a low cuboidal epithelium and, immediately beneath this surface epithelium; there is a dense  
333 connective tissue sheath, a tunica albuginea. The cortex is composed of ovarian follicles, which usually  
334 occur in different stages of development (least mature to most mature). The inner medulla is composed  
335 by a loose connective tissue that contains nerves, blood vessels and lymph vessels which enter the ovary  
336 at the hilus from the mesovarium.

337

338 In the pilot study assessing 5½ month-old pigs with no previous surgery (n=6; control group), we  
339 observed in 5 of them that the cortex was mainly disrupted by numerous primordial follicles, primary and  
340 secondary follicles. In only one case, there was also tertiary or cystic follicles that are usually located at  
341 the periphery. In this series, nineteen ovaries from the ten 6½ month-old pigs that were injured 30 days  
342 earlier showed a lobulated surface – "blister like" structures – easily visible to the naked eye. When the  
343 ovaries were cut, the general macroscopic aspect was multicystic measuring from 1 to 5 mm in diameter.  
344 Histologically, the ovaries presented many tertiary or cystic follicles amid the least mature follicles. In  
345 three of these twenty ovaries, fibrosis was observed in connective tissue from the mesovarium (**Figure 4**).

346

347 **Figure 4.** Ovarian histology prior to and 30 days after peritubal injury (hematoxylin-eosin staining).  
348 Images **a** and **b** exhibit micrographs of an ovary from a 5½ month-old pig with no previous surgery  
349 (control group) showing ovarian follicles in different stages (primordial, primary and secondary follicles).  
350 Images **c** and **d** exhibit an ovary from a 6½ months old pig assessed 30 days after a standardized  
351 peritubal laparoscopic injury, which already exhibit many cystic follicles (CF, tertiary follicles) amid least  
352 mature follicles. In image **d**, fibrosis is evident on the ovarian surface (arrow).

353

354 The fallopian tubes (oviducts) are bilateral, tortuous and tubular structures that extend from the  
355 ovary to the uterine horns and are divided into infundibulum, ampulla and isthmus. The fallopian tubes

356 transport the ovum from the ovary and the spermatozoa from the site of deposition to the site of  
357 fertilization. The histologic structure is composed of an internal mucosal layer covered by a simple or  
358 pseudostratified columnar epithelium with some ciliated cells. The mucosa layer is continuous with the  
359 submucosa, consisted of loose connective tissue. The tunica mucosa-submucosa is folded and covered  
360 by a thin muscular layer consisting mostly of circular smooth muscle bundles. Externally, the tunica  
361 serosa contains many blood vessels and nerves with a superficial mesothelial cell layer and the  
362 connective tissue from the mesosalpinx is observed at one pole and is part of the lining of the abdominal  
363 cavity representing a fold of the broad ligament that stretches from the ovary to the uterine tube that  
364 supports the fallopian tube. Although all oviducts had “normal” histological findings in the control group,  
365 nine from the twenty injured oviducts in this series showed mild to moderate fibrosis in the tunica serosa,  
366 sometimes associated with a small quantity of mononuclear inflammatory cells (**Figure 5**).

367

368 **Figure 5.** Histology of oviducts prior to and 30 days after peritubal injury (hematoxylin-eosin staining).  
369 Images **a** and **b** exhibit micrographs of an oviduct from a 5½ months old pig with no previous surgery  
370 (control group) showing an internal mucosal layer covered by a simple or pseudostratified columnar  
371 epithelium. The tunica mucosa-submucosa is folded and exhibit a papillary architecture - a thin muscular  
372 layer (**M**) and, externally, the serosa (**S**) and mesosalpinx with many blood vessels (dotted circles in the  
373 image **a**). Images **c** and **d** depict an oviduct from a 6½ month-old pig assessed 30 days after a  
374 standardized peritubal laparoscopic injury; there is discrete serositis with edema and inflammatory cells.  
375 The arrows point to fibrosis in the serosa.

376

377 The uterus in swine has bilateral horns (cornua) connected to the uterine tubes and an unpaired  
378 body (corpus). The uterine wall consists of three layers: endometrium with uterine glands covered by  
379 pseudostratified columnar epithelium surrounded by a connective tissue (stroma); the myometrium with  
380 an thick inner circular smooth muscle and outer longitudinal smooth muscle bundles); and an external  
381 layer called serosa (or perimetrium) that is continuous with the corresponding structures in the broad  
382 ligament of the uterus. Although all uteri had “normal” histological findings in the control group, some  
383 important histopathological findings were observed in the pigs that underwent laparoscopic injury, mainly  
384 in the uterine wall (miometrium) and the serosa/perimetrium (**Figure 6**). The main findings consisted of  
385 serosa-isolated fibrosis (6 uteri) and fibrosis with inflammatory response associated with giant cell  
386 reaction involving a foreign body (attributed to the suture thread) in the myometrium, serosa and the  
387 connective tissue from the broad ligament of the uterus (12 uteri). Actually, just one uterine horn was  
388 considered histologically normal, that is, with no evidence of local inflammatory response secondary to  
389 the prior injury.

390

391 **Figure 6.** Uterine histology prior to 30 days after peritubal injury (hematoxylin-eosin staining). Images **a**  
392 and **b** exhibit micrographs of the uterus of a 5½ month-old surgically naive pig from the control group with  
393 normal endometrium (E), myometrium (M) with the inner circular smooth muscle and outer longitudinal  
394 smooth muscle bundles, and a thin serosa (S). Images **c**, **d**, **e** and **f** exhibit micrographs of the uterus

395 from a 6½ month-old pig assessed 30 days after a standardized peritubal laparoscopic injury; there is  
396 fibrosis in the serosa and perimetrium. Giant cell reactions attributed to the suture thread are identified by  
397 arrows.

398  
399

## 400 **Biomarkers**

401

402 The baseline values of blood biomarkers that were assessed immediately before the first surgery  
403 (injury) and also immediately before second-look surgery are compared in **Table 2**. Some statistically  
404 significant but clinically insignificant changes were noticed for the following assays: serum albumin,  
405 globulin, C-reactive protein, fibrinogen, and conjugated and unconjugated bilirubin.

406

407 All animals showed trace hemoglobin in the urine (+ to ++ / 4+) and 5 pigs had microscopic  
408 hematuria (1 to 5 red blood cells per high-power field of urine sediment). These urinalysis findings may  
409 simply be a consequence of transdermal suprapubic aspiration technique used to obtain the urine  
410 specimens.

411

412

413

414

415

416

417

418

419

420

421

422

423

424

425

426

427

428

429

430

431

432

433

434

435

436

437 **Table 2.** Baseline values of blood biomarkers in 10 young female pigs prior to and 30 days after  
 438 standardized laparoscopic surgery that was performed to provoke adhesion formation  
 439

| Biomarker                            | Method                 | [Normal range] | Before |        |      | After |        |      | P value      |
|--------------------------------------|------------------------|----------------|--------|--------|------|-------|--------|------|--------------|
|                                      |                        |                | min    | median | max  | min   | median | max  |              |
| <b>Hematopoietic system</b>          |                        |                |        |        |      |       |        |      |              |
| RBC (x10 <sup>6</sup> /mL)           | Automation (ABC-VET)   | [5-8]          | 5,2    | 6,41   | 6,79 | 6,1   | 6,59   | 7,3  | 0.190        |
| Hemoglobin (g/dL)                    | Automation (ABC-VET)   | [10-18]        | 9      | 11,1   | 12,3 | 9,6   | 11,2   | 12,1 | 0.912        |
| MCV (fL)                             | Automation (ABC-VET)   | [50-67]        | 50     | 55,5   | 64   | 50    | 52     | 56   | 0.075        |
| MCH (%)                              | Automation (ABC-VET)   | [30-34]        | 30     | 32     | 33   | 30    | 31     | 34   | 0.971        |
| Platelets (x10 <sup>3</sup> cel/mcL) | Automation (ABC-VET)   | [200-500]      | 204    | 300    | 384  | 244   | 330    | 453  | 0.481        |
| <b>Nutritional status</b>            |                        |                |        |        |      |       |        |      |              |
| Weight (Kg)                          | Mechanical scale       |                | 24.3   | 28.0   | 31.3 | 33.6  | 41.1   | 49.3 |              |
| Ponderal gain (%)                    | Calculation            |                |        |        |      | 28.9  | 49.0   | 67.0 |              |
| Lymphocytes (cel/mcL)                | Automation (ABC-VET)   | [4500-13000]   | 3300   | 5177   | 6776 | 5202  | 5918   | 9028 | 0.165        |
| Total protein (g/dL)                 | Biuret test            | [7-8,9]        | 7,1    | 7,6    | 8,4  | 5     | 7,3    | 8,2  | 0.075        |
| Albumin (g/dL)                       | Bromocresol-green test | [1,9-3,3]      | 2,4    | 2,6    | 3,2  | 2,8   | 3      | 3,3  | <b>0.007</b> |

440

### Immune response

|                                |                            |           |      |       |       |           |       |       |                  |
|--------------------------------|----------------------------|-----------|------|-------|-------|-----------|-------|-------|------------------|
| Globulin (g/dL)                | Calculation                | [5,3-6,4] | 4,5  | 4,85  | 5,9   | 2,1       | 4,15  | 5,2   | <b>0.007</b>     |
| A/G ratio                      | Calculation                | [0,5-1,0] | 0,41 | 0,55  | 0,65  | 0,58      | 0,76  | 1,39  | <b>&lt;0.001</b> |
| WBC (x10 <sup>3</sup> cel/mcL) | Automation (ABC-VET)       | [10-22]   | 7500 | 10300 | 12100 | 1020<br>0 | 11300 | 14800 | 0.075            |
| Eosinophils (cel/mcL)          | Automation (ABC-VET)       | [100-200] | 75   | 114,5 | 535   | 102       | 113   | 148   | 0.853            |
| CRP (mg/dL)                    | Turbidimetry               |           | <0,6 | <0,6  | 1     | <0,6      | <0,6  | 1,5   | <b>0.011</b>     |
| ESR (mm/h)                     | Westerngreen               |           | 4    | 6     | 9     | 5         | 6     | 8     | 0.247            |
| LDH (U/L)                      | UV kinetic (LABMAX PLENNO) | [380-634] | 791  | 986   | 1106  | 734       | 912   | 1290  | 0.739            |
| Fibrinogen (mg/dL)             | Refractometry              | 100-500   | 100  | 150   | 900   | 200       | 300   | 800   | <b>0.023</b>     |

### Renal system

|                    |                         |           |     |      |     |     |     |     |       |
|--------------------|-------------------------|-----------|-----|------|-----|-----|-----|-----|-------|
| BUN (mg/dL)        | Enzimatic (Labtest VET) | [21-64]   | 23  | 24,5 | 29  | 21  | 27  | 36  | 0.481 |
| Creatinine (mg/dL) | Enzimatic (Trinder)     | [0,5-2,1] | 0,5 | 1,45 | 2,1 | 0,5 | 1,3 | 2,1 | 0.579 |

### Hepatic system

|           |                           |           |     |       |     |     |       |     |       |
|-----------|---------------------------|-----------|-----|-------|-----|-----|-------|-----|-------|
| AP (U/L)  | Colorimetry (Labtest VET) | [118-395] | 138 | 241,5 | 300 | 120 | 235,5 | 347 | 0.684 |
| GGT (U/L) | Kinetic (Fixed-time)      | [10-60]   | 26  | 52    | 66  | 10  | 47    | 66  | 0.315 |

|                     |                                     |             |      |       |     |      |      |      |                  |
|---------------------|-------------------------------------|-------------|------|-------|-----|------|------|------|------------------|
| ALT (U/L)           | UV kinetic IFCC pyridoxal phosphate | [31-58]     | 31   | 52,5  | 80  | 33   | 59,5 | 101  | 0.481            |
| AST (U/L)           | UV kinetic IFCC pyridoxal phosphate | [32-84]     | 28   | 37    | 96  | 32   | 36   | 200  | 0.529            |
| T-bilirubin (mg/dL) | Colorimetry (Labtest DCA)           | [<0,01-0,3] | 0,2  | 0,275 | 1,2 | 0,06 | 0,1  | 0,2  | <b>&lt;0.001</b> |
| D-bilirubin (mg/dL) | Colorimetry (Labtest DCA)           | [<0,01-0,2] | 0,06 | 0,18  | 0,4 | 0,04 | 0,08 | 0,12 | <b>0.002</b>     |
| I-bilirubin (mg/dL) | Calculation                         | [<0,01-0,1] | 0,07 | 0,1   | 0,8 | 0,01 | 0,07 | 0,3  | <b>0.011</b>     |

441

442 RBC: Red blood cells; MCH: Mean corpuscular hemoglobin; MCV: Mean corpuscular volume; A/G ratio:  
 443 Albumin to Globulin ratio; WBC: White blood cells; CRP: C-reactive protein; ESR: Erythrocyte  
 444 sedimentation rate; LDH: lactate dehydrogenase; BUN: Blood urea nitrogen; AP: Alkaline phosphatase;  
 445 GGT: gamma-glutamyltransferase; ALT: Alanine aminotransferase; AST: Aspartate aminotransferase; T-  
 446 bilirubin: Total bilirubin; D-bilirubin: Conjugated ("direct") bilirubin; I-bilirubin: Unconjugated ("indirect")  
 447 bilirubin. Normal values for studied blood parameters according to our laboratory.

448 P value: non-parametric Mann-Whitney U test.

449

450



## 451 Discussion

452

453 This interdisciplinary experimental study describes a porcine model that can be used to assess  
454 postoperative peritoneal adhesions, specifically those involving the female reproductive tract that occur  
455 after abdominal and pelvic laparoscopic procedures. Besides detailed specifications of the species, our  
456 description includes the preoperative preparation (including premedication and the anesthesia regimen),  
457 the laparoscopic surgical technique to provoke adhesions in female reproductive tract, the living  
458 conditions before the animals undergo a second-look laparoscopic procedure, as well as the ordinal  
459 grade and scale that can be used to categorize and quantify the adhesions that have arisen in the interval  
460 since the initial surgery. This study also highlights the potential for using this non-rodent animal model to  
461 assess the safety of prophylactic agents with regard to possible toxicological effects on multiple systems.

462

463 Here we present several key points that may help researchers plan and conduct experimental  
464 trials to test prophylactic agents that prevent or minimize adhesion formation. First, the incidence of  
465 postoperative adhesions in this porcine model was comparable to that observed in humans, possibly a  
466 consequence of taxonomic proximity [10,18,19,20]. Second, by using a laparoscopic approach to perform  
467 the injury and to evaluate adhesion formation in this porcine model, researchers can not only perform the  
468 same procedures and administer the same prophylactic agents that are contemplated for use in humans,  
469 but also carry out a more thorough toxicological assessment of the hepatic, renal, inflammatory and  
470 hematopoietic systems than has been performed in the vast majority of studies to date. Third, in addition  
471 to assessing adhesion formation and toxicological biomarkers, this animal model also allows a meticulous  
472 microscopic evaluation of the potential consequences of exposing reproductive organs (i.e. uterine horn,  
473 ovaries and oviducts) to chemical substances through late histopathological observation.

474

475 The histopathological evaluations performed 30 days after the laparoscopic injury – in the  
476 absence of any prophylactic agent – did not detect alterations to the reproductive tract other than a  
477 natural inflammatory response inherent to the tissue healing process. Indeed, all histopathological  
478 observations in this series were considered absolutely compatible with the natural development of the  
479 reproductive tract of this breed of pig, which reaches maturity between the fifth and sixth months [26] and  
480 normal estrus, when well treated under confinement.

481

482 Fourth, there are considerations regarding the animal's size and weight. A pig whose weight is in  
483 the range of 30 to 50 Kg is fairly close to the weight of humans. These means it is possible to assess the  
484 same kind of injuries associated with laparoscopic procedures and to test the same strategies to prevent  
485 adhesion formation using the same devices, kits, agents and doses. Although there could be several  
486 potential advantages to using miniature adult pigs which weigh up to 32 Kg and have a slower rate of

487 growth [26], these advantages should be balanced with the benefits of using young larger pigs [9], which  
488 may have a very high growth rate. In this series, for example, the median weight gain in 30 days was 13.4  
489 Kg (min 7.9; max 19.1).

490

491         Regarding the discrete (but statistically significant) changes observed in the main serum proteins  
492 (albumin and globulin), in two inflammatory biomarkers (C-reactive protein and fibrinogen), and in both  
493 conjugated and unconjugated bilirubin (**Table 2**), these findings did not point to any specific clinical  
494 interpretation, and there was no case in which the blood tests taken together were suggestive of some  
495 subclinical pathological condition. Indeed, all the animals were examined by a senior veterinarian  
496 (F.L.F.M.) just prior to the second-look surgery and were deemed healthy. Therefore, the main finding  
497 concerning the assessed biomarkers was the perception that some discrete changes in blood tests may  
498 occur, probably as a natural physiological response, independent of the use of any specific prophylactic  
499 agent.

500

501         Another point of discussion may be how long we should wait to reassess the animal. The time for  
502 remesotheliazation of the peritoneum (or the bridging adhesion) is thought to be no more than 3 to 5 days  
503 [27]. Thus the optimal time to assess postoperative adhesions can consider both the operational  
504 challenges and cost of caring for the animals for an extended period versus a preference for a longer  
505 waiting period, which may favor the identification of late toxic reactions.

506

507         Regarding the macroscopic and microscopic assessment of adhesion formation, researchers can  
508 elect to assess it directly by necropsy, rather than by laparoscopy. Indeed, although unconventional as  
509 compared with the assessment made in living humans, necropsy may be more practical and less  
510 expensive in animal models (not assessed in this study). Still, the advantages of a laparoscopic view  
511 should not be underestimated. These include the high resolution and about 20-fold magnification, the  
512 option of recording video, and the fact that surgeons are accustomed to surveying adhesions in humans  
513 during second-look laparoscopic procedures.

514

## 515 **Limitations and strengths**

516

517         Our study has limitations, particularly, regarding the number of animals. Only 10 animals were  
518 used in the intervention arm of the study (and another six animals as controls) and, consequently, the  
519 estimates have wide confidence intervals. Of course, this was a consequence of our efforts to adhere to  
520 the guiding principles for more ethical use of animals in testing (including the use of methods that enable  
521 researchers to obtain comparable levels of information from fewer animals), in accordance with both

522 Brazilian federal laws and Institutional policies that require us to apply the principles of the 3Rs  
523 (replacement, reduction, and refinement) to animal research [17].

524

525 The main strengths of this experimental study included: (1) the approval by an institutional  
526 committee on the ethical use of animals; (2) it used animals with a body mass of the same order of  
527 magnitude as humans; (3) it presented a protocol of anesthesia and postoperative analgesia compatible  
528 with that offered to humans; (4) it put the main focus on the reproductive tract (uterine horn), on which  
529 adhesions are known to cause infertility problems; (5) it used laparoscopic assessment of the adhesions  
530 with about 20 times of magnification, as is usually done in humans; (6) it presented practical and feasible  
531 ways to collect samples for a more thorough toxicological evaluation (i.e. including hepatic, renal,  
532 inflammatory, and hematopoietic systems) than is performed in the vast majority of studies that have  
533 been testing prophylactic agents or products; (7) it used, from the taxonomic perspective, a species more  
534 closely related to humans as compared to birds, ruminants, rodents and dogs; (8) it optimized the use of  
535 animals by offering the possibility of performing laparoscopic training after the experiment was completed  
536 and before euthanasia; and (9) it presented an estimated prevalence of adherence (75%) close to real  
537 values verified in several clinical studies in humans [10,18,19,20]. Moreover, unlike a study in which a  
538 porcine uterine horn adhesion model just mimics a laparoscopic procedure [14], we present an animal  
539 model that uses laparoscopic procedures not only to form adhesions, but also to assess them.

540

## 541 **Recommendations**

542

543 There is great interest in new adhesion prevention technologies [28]. In order to evaluate the risk  
544 of toxic effects of prophylactic agents, we suggest the use of multiple tests using blood and urine  
545 specimens, not only to detect changes in the systemic inflammatory response, but also to assess the  
546 possibility of clinically important adverse effects on the renal, hepatic and hematopoietic systems. From  
547 the perspective of protecting the public's health by ensuring the safety of pharmaceutical and medical  
548 devices, the use of this porcine model provides information that may exceed the minimum requirements  
549 of the national and international agencies responsible for the toxicological safety of medical products,  
550 including those employed to prevent adhesion formation.

551

552 With regard to the anesthesia and analgesia used, we recommend premedication with multiple  
553 drugs because the synergistic effect of a combination of drugs optimizes the dissociation of the animal  
554 from the environment. Acepromazine and midazolam induce muscle relaxation, ketamine guarantees  
555 dissociative analgesia during handling until the moment of inhaled induction of general anesthesia, and  
556 atropine promotes blockade of sialorrhea and vagal reflexes, so the animal can be manipulated with both  
557 minimal suffering and maximum safety [29].

558

559           Although we did not focus on controlling this variable, we recommend that an effort should be  
560 made so that study animals receive the same quantity of food rations during the postoperative period.  
561 One approach would be to segregate them in individual boxes at least during alimentation. In this way, it  
562 may be possible to minimize heterogeneity in the individual weight gain (a potential confounder that  
563 ranged from 28.9% to 67.0% in this series) (**Table 2**). If individual feeding is feasible, it might also be  
564 possible to administer some drugs orally (i.e. dissolved in small amounts of food) rather than parenterally.

565  
566           Because urine specimens were collected via transdermal suprapubic aspiration, we considered  
567 the presence of scant hemoglobin and the occurrence of microscopic hematuria as normal. Such findings  
568 should be expected in future studies if urine specimens are obtained using the same technique.

569

## 570 **Conclusion**

571           The use of a porcine model as shown in this study can be a useful *in vivo* animal platform to test  
572 the efficacy and safety of prophylactic agents against postoperative peritubal adhesions. We provide  
573 several recommendations in order to both minimize animal suffering and avoid problems during  
574 experimental trials.

575

## 576 **Sources of Financial or Material Support**

577

578 This study was supported by DMC Importação e Exportação de Equipamentos Ltda which provides  
579 advanced medical devices and equipments for surgical procedures through its product development  
580 centers and manufacturing facilities in São Carlos - SP, Brazil, and by Instituto Crispi de Cirurgias  
581 Minimamente Invasivas (Rio de Janeiro - RJ, Brazil).

582

## 583 **Conflicts of Interest of the Investigators**

584

585 The authors have no conflicts of interest.

586

## 587 **Acknowledgements**

588

589 The authors thank Research and Education Center for Phototherapy in Health Sciences (NUPEN) for the  
590 technical support; Dr. Mauren Lopes and Dr. Marina Filgueiras for the careful anesthesia of the animals;  
591 Dr. Leigh J. Passman for reviewing the manuscript; and PJ & Christian (Hightec Corporation) for image  
592 consulting.

593

## 594 REFERENCES

595

- 596 1. Tabibian N, Swehli E, Boyd A, Umbreen A, Tabibian JH. Abdominal adhesions: A practical review of an  
597 often overlooked entity. *Ann Med Surg.* 2017;15:9-13. Review.
- 598 2. Torres K, Pietrzyk Ł, Plewa Z, Załuska-Patel K, Majewski M, Radzikowska E, et al. TGF-β and  
599 inflammatory blood markers in prediction of intraperitoneal adhesions. *Adv Med Sci.* 2018;63(2):220-223.
- 600 3. Practice Committee of American Society for Reproductive Medicine in collaboration with Society of  
601 Reproductive Surgeons. Pathogenesis, consequences, and control of peritoneal adhesions in  
602 gynecologic surgery: a committee opinion. *FertilSteril.* 2013;99(6):1550-1555. Review.
- 603 4. Li J, Zhu J, He T, Li W, Zhao Y, Chen Z, et al. Prevention of intra-abdominal adhesion using  
604 electrospun PEG/PLGA nanofibrous membranes. *Mater SciEng C Mater Biol Appl.* 2017;78:988-997.
- 605 5. Eickhoff RM, Kroh A, Rüksamen K, Heise D, Binnebösel M, Klinge U, et al. AK03, a new recombinant  
606 fibrinogenase prevents abdominal adhesions in a rat model without systemic side effects. *J Surg Res.*  
607 2018;222:85-92.
- 608 6. Askari VR, Rahimi VB, Zamani P, Fereydouni N, Rahmanian-Devin P, Sahebkar AH, et al. Evaluation  
609 of the effects of Iranian propolis on the severity of post operational-induced peritoneal adhesion in rats.  
610 *Biomed Pharmacother.* 2018;99:346-353.
- 611 7. de Wilde RL. Regarding "Evaluation of a Spray-type Novel Dextrin Hydrogel Adhesion Barrier under  
612 Laparoscopic Conditions in a Porcine Uterine Horn Adhesion Model". *J Minim Invasive Gynecol.*  
613 2018;25(7):1311.
- 614 8. Charboneau AJ, Delaney JP, Beilman G. Fucoidans inhibit the formation of post-operative abdominal  
615 adhesions in a rat model. *PLoS One.* 2018;13(11):e0207797.
- 616 9. Choi GJ, Park HK, Kim DS, Lee D, Kang H. Effect of statins on experimental postoperative adhesion: a  
617 systematic review and meta-analysis. *Sci Rep.* 2018;8(1):14754.
- 618 10. Ahmad G, Mackie FL, Iles DA, O'Flynn H, Dias S, Metwally M, et al. Fluid and pharmacological  
619 agents for adhesion prevention after gynaecological surgery. *Cochrane Database Syst Rev.* 2014;  
620 (7):CD001298. Review.
- 621 11. Hindocha A, Beere L, Dias S, Watson A, Ahmad G. Adhesion prevention agents for gynaecological  
622 surgery: an overview of Cochrane reviews. *Cochrane Database Syst Rev.* 2015;1:CD011254. Review.
- 623 12. Ahmad G, O'Flynn H, Hindocha A, Watson A. Barrier agents for adhesion prevention after  
624 gynaecological surgery. *Cochrane Database Syst Rev.* 2015;(4):CD000475. Review.
- 625 13. Lin LX, Yuan F, Zhang HH, Liao NN, Luo JW, Sun YL. Evaluation of surgical anti-adhesion products  
626 to reduce postsurgical intra-abdominal adhesion formation in a rat model. *PLoS One.*  
627 2017;12(2):e0172088.

- 628 14. Kai M, Maeda K, Tasaki M, Kira S, Nakamura S, Chino N, et al. Evaluation of a Spray-type, Novel  
629 Dextrin Hydrogel Adhesion Barrier Under Laparoscopic Conditions in a Porcine Uterine Horn Adhesion  
630 Model. *J Minim Invasive Gynecol*. 2018;25(3):447-454.
- 631 15. Newman ME, Musk GC, He B. Establishment of laparoscopic live donor nephrectomy in a porcine  
632 model: techniques and outcomes in 44 pigs. *J Surg Res*. 2018;222:132-138.
- 633 16. Hein S, Schoeb DS, Grunwald I, Richter K, Haberstroh J, Seidl M, et al. Viability and biocompatibility  
634 of an adhesive system for intrarenalembodding and endoscopic removal of small residual fragments in  
635 minimally-invasive stone treatment in an in vivo pig model. *World J Urol*. 2018;36(4):673-680.
- 636 17. Kilkeny C, Browne WJ, Cuthill IC, Emerson M, Altman DG. Improving bioscience research reporting:  
637 the ARRIVE guidelines for reporting animal research. *PLoS Biol*. 2010 Jun 29;8(6):e1000412.
- 638 18. Ferland R, Mulani D, Campbell PK. Evaluation of a sprayable polyethylene glycol adhesion barrier in  
639 a porcine efficacy model. *Hum Reprod*. 2001;16(12):2718-23.
- 640 19. Cheung JP, Tsang HH, Cheung JJ, Yu HH, Leung GK, Law WL. Adjuvant therapy for reduction of  
641 postoperative intra-abdominal adhesion formation. *Asian J Surg*. 2009;32(3):180-6. Review.
- 642 20. Trochsler M, Maddern GJ. Adhesion barriers for abdominal surgery: a sticky problem. *Lancet*.  
643 2014;4;383(9911):8-10.
- 644 21. Coccolini F, Ansaloni L, Manfredi R, Campanati L, Poiasina E, Bertoli P, et al. Peritoneal adhesion  
645 index (PAI): proposal of a score for the "ignored iceberg" of medicine and surgery. *World J Emerg Surg*.  
646 2013;8(1):6.
- 647 22. de Oliveira FMM, Pereira TRD, Demoro AVE. Punções, pneumoperitônio e inventário. In: Crispi CP,  
648 de Oliveira FMM, Damian Jr JC, de Oliveira MAP, Ribeiro PAG, editors. *Tratado de endoscopia*  
649 *ginecológica*. Rio de Janeiro: REVINTER; 2012.p.130-139.
- 650 23. Lee KC, Lu CC, Lin SE, Chang CL, Chen HH. Infiltration of Local Anesthesia at Wound Site after  
651 Single-Incision Laparoscopic Colectomy Reduces Postoperative Pain and Analgesic Usage.  
652 *Hepatogastroenterology*. 2015;62(140):811-816.
- 653 24. Ali S, Zarin M, Jan Z, Maroof A. Effect of Bupivacaine on Postoperative Pain after Laparoscopic  
654 Cholecystectomy. *J Coll Physicians Surg Pak*. 2018;28(9):663-666.
- 655 25. Crispi CP, Crispi CP Jr, da Silva Reis PS Jr, Mendes FLF, Filgueiras MM, de Freitas Fonseca M.  
656 Hemostasis with the Ultrasonic Scalpel. *JLS*. 2018;22(4). pii: e2018.00042.
- 657 26. Stricker-Krongrad A, Shoemaker CR, Bouchard GF. The Miniature Swine as a Model in Experimental  
658 and Translational Medicine. *ToxicolPathol*. 2016;44(4):612-623.
- 659 27. Diamond MP. Reduction of postoperative adhesion development. *Fertil Steril*. 2016;106(5):994-  
660 997.e1.
- 661 28. Han ES, Scheib SA, Patzkowsky KE, Simpson K, Wang KC. The sticky business of adhesion  
662 prevention in minimally invasive gynecologic surgery. *Curr Opin Obstet Gynecol*. 2017;29(4):266-275.
- 663 29. Malavasi L M. Suínos. In: Lumb WV; Jones. 5ª Ed. *Anestesiologia e Analgesia em Veterinária*. Rio  
664 de Janeiro, RJ. Editora Roca; 2017. pp. 923-936.

A

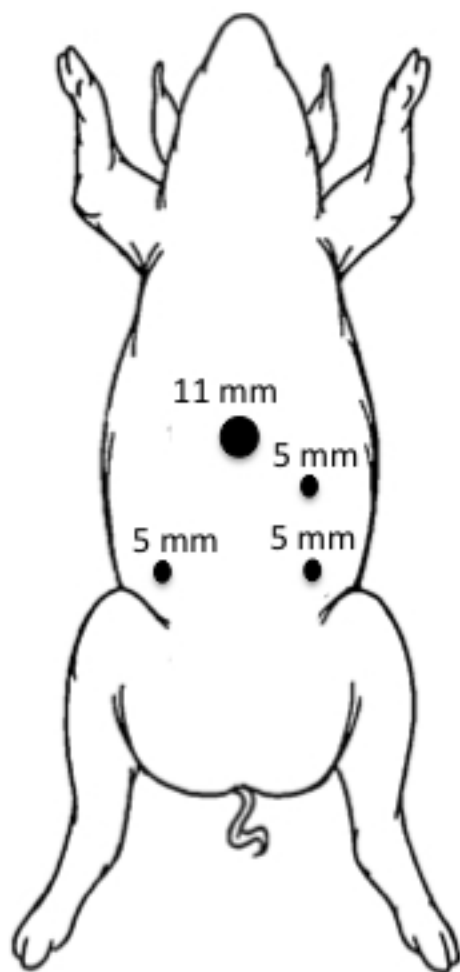

- A Right upper
- B Epigastrium
- C Left upper
- D Left flank
- E Left lower (uterine horn)
- F Pelvis
- G Right lower (uterine horn)
- H Right flank
- I Central (umbilical scar)
- L Bowel to bowel (regardless of site)

**Adhesion grade score**

- 0 No adhesions
- 1 Filmy adhesions, blunt dissection
- 2 Strong adhesions, sharp dissection
- 3 Very strong vascularized adhesions, sharp dissection, damage hardly preventable

B

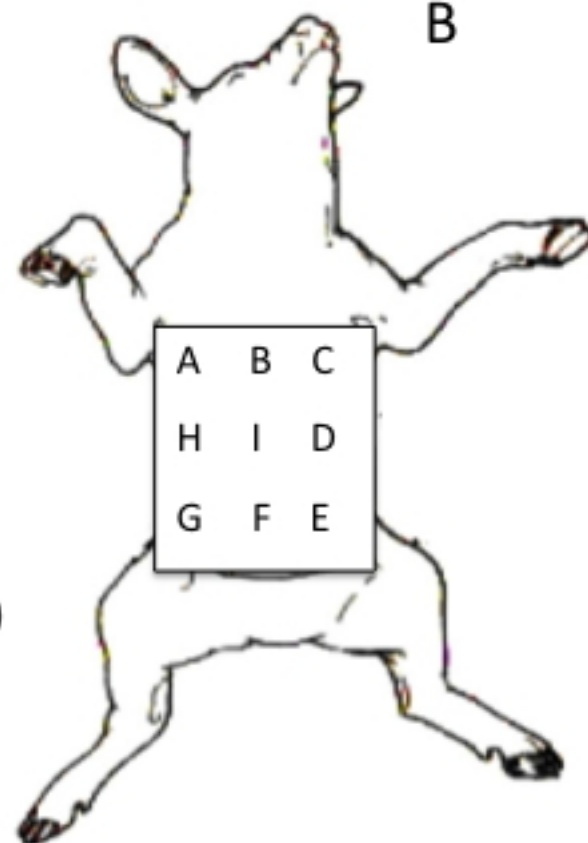

Figure 1

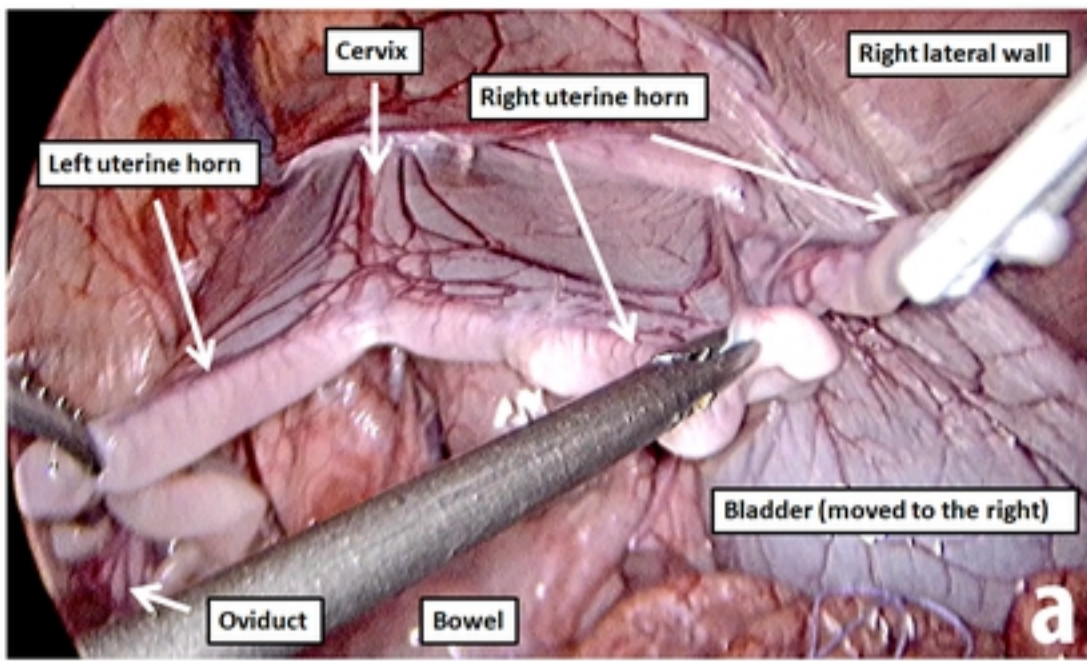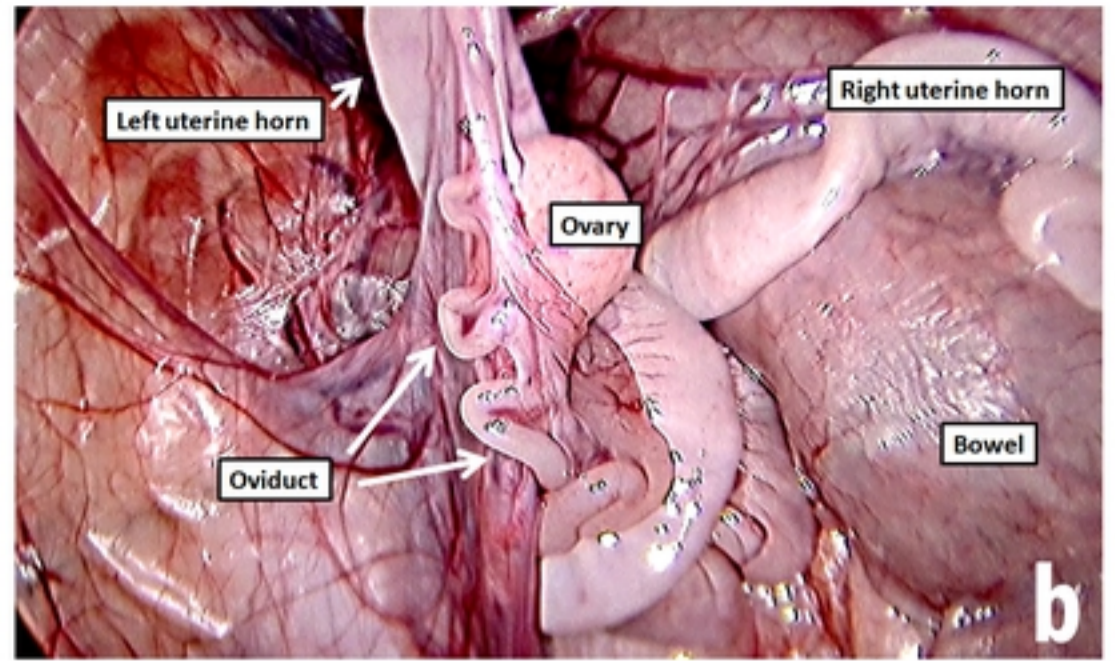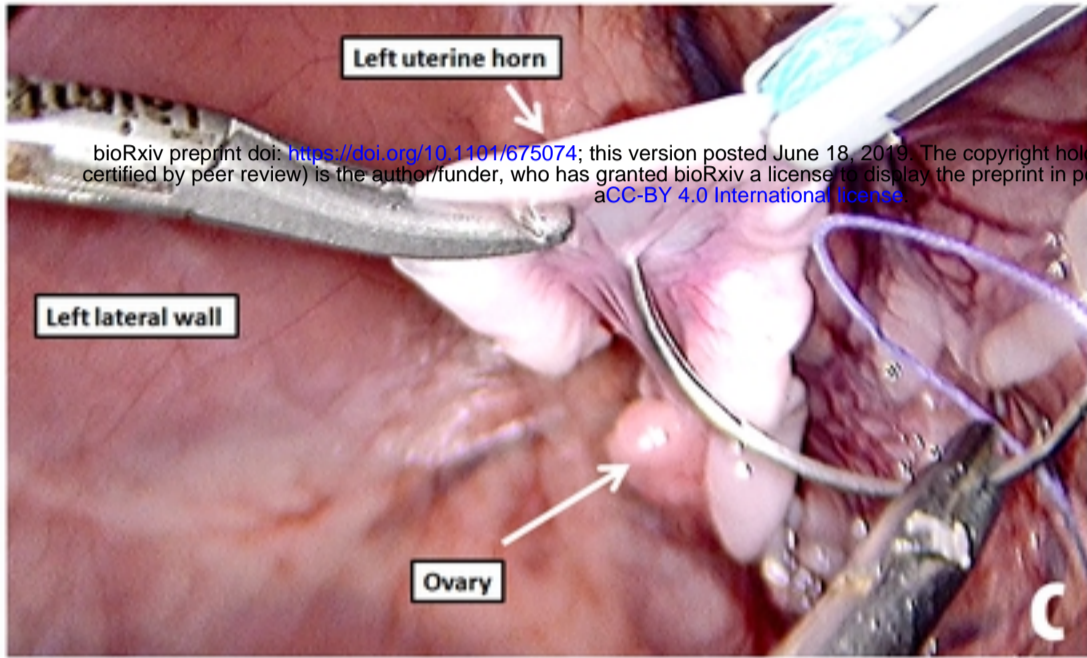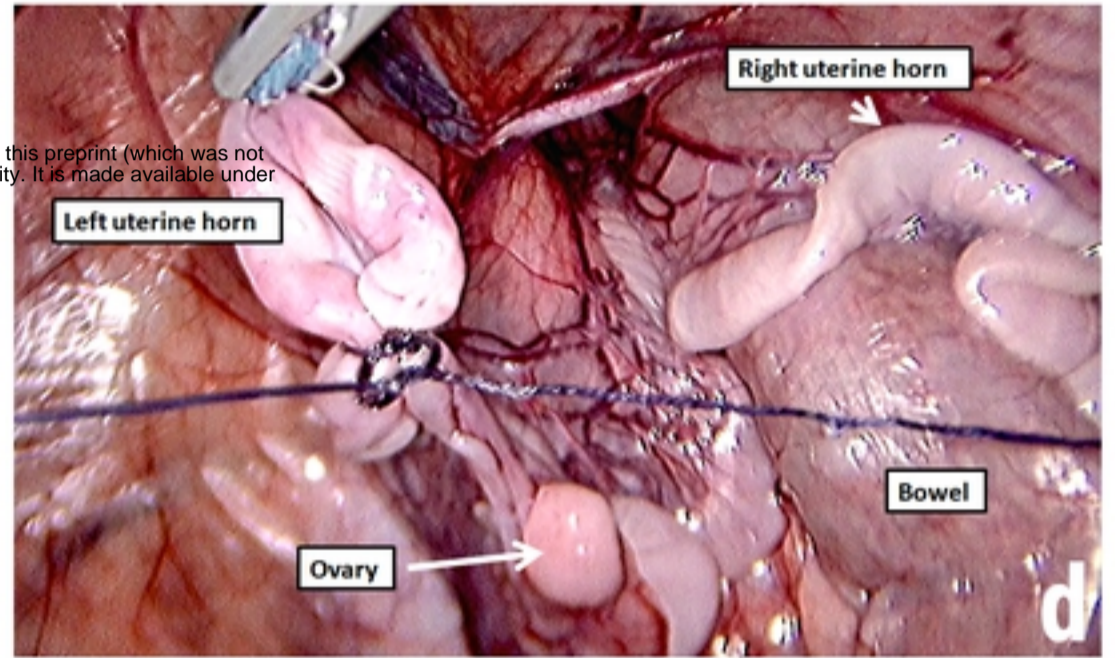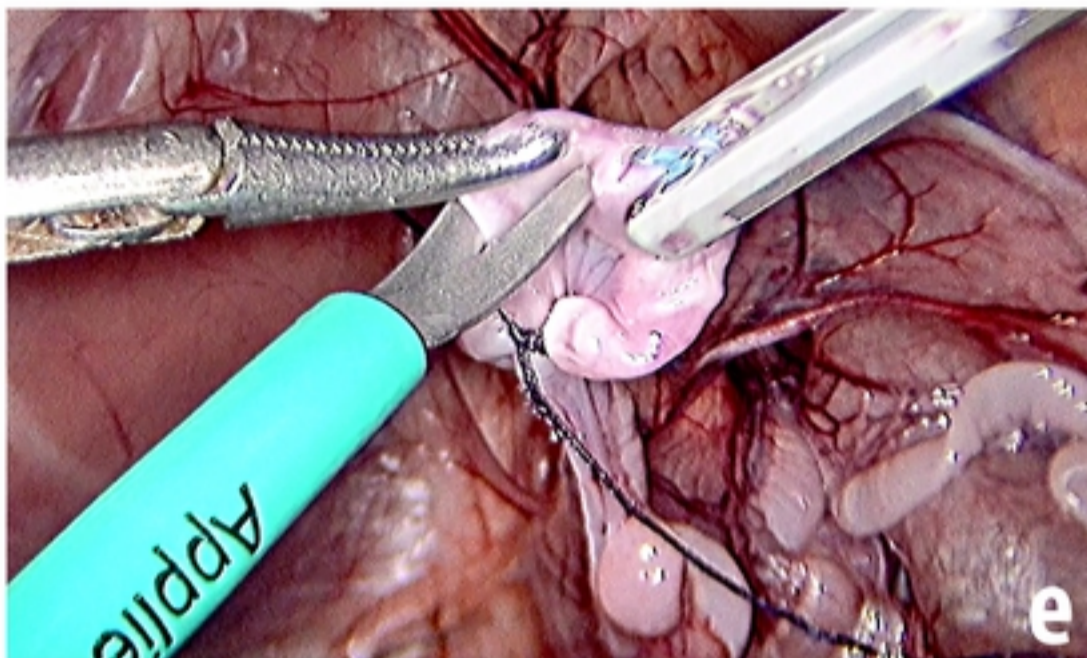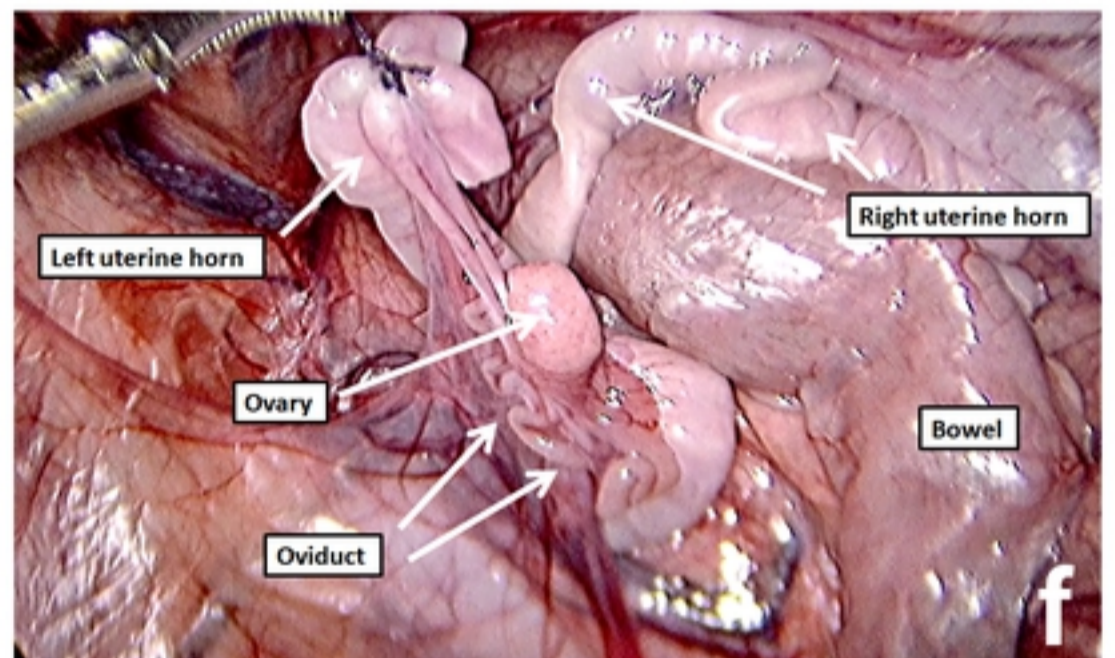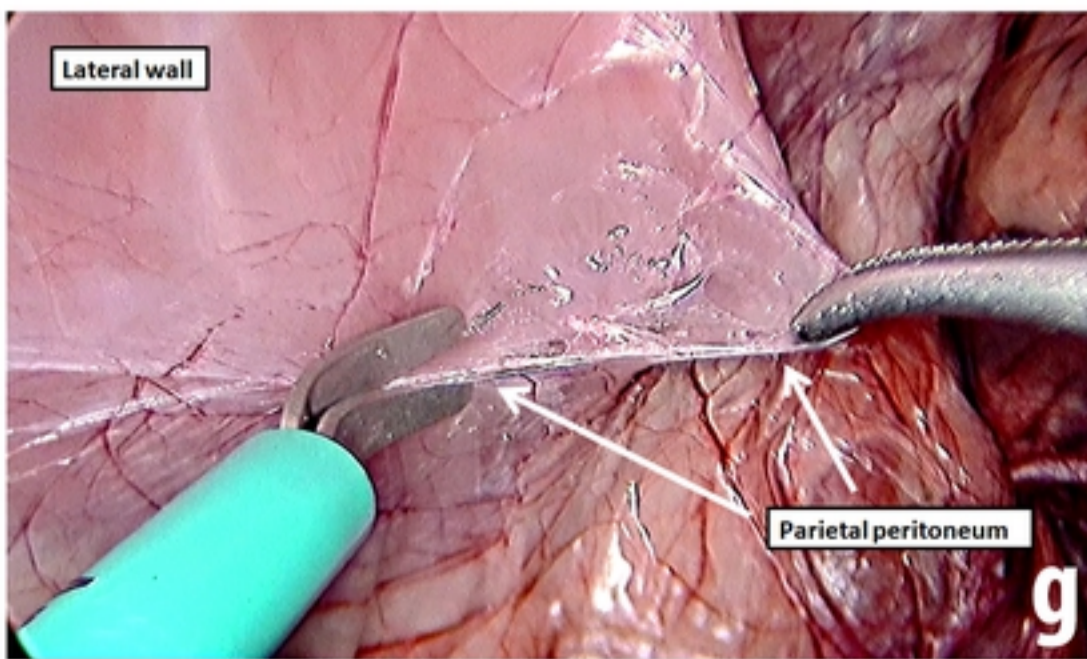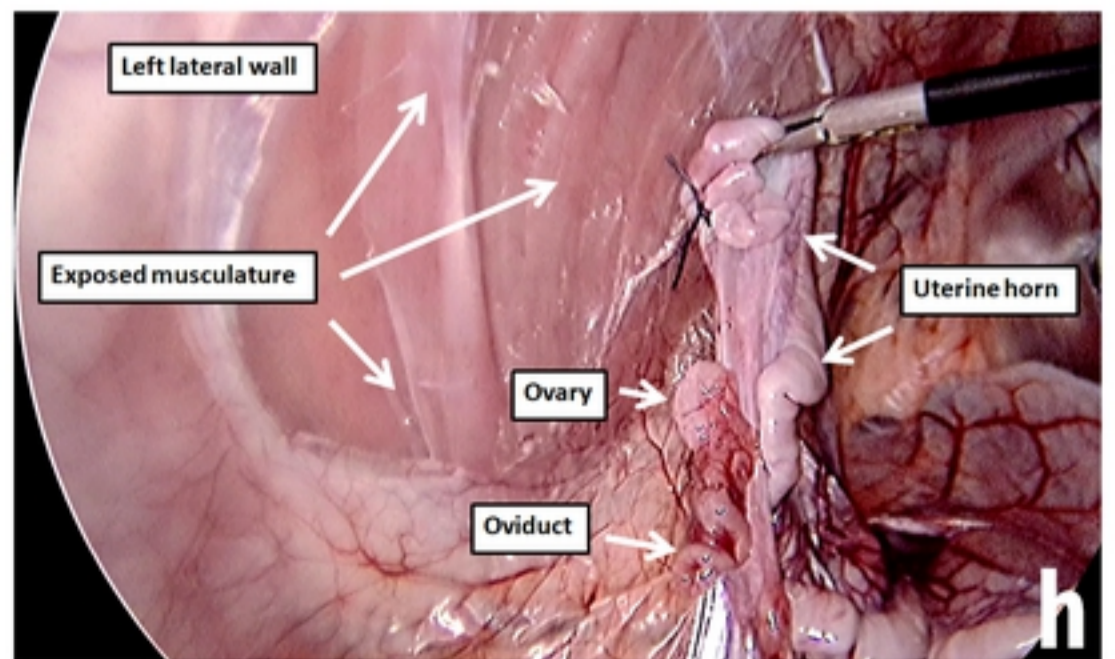

Figure 2



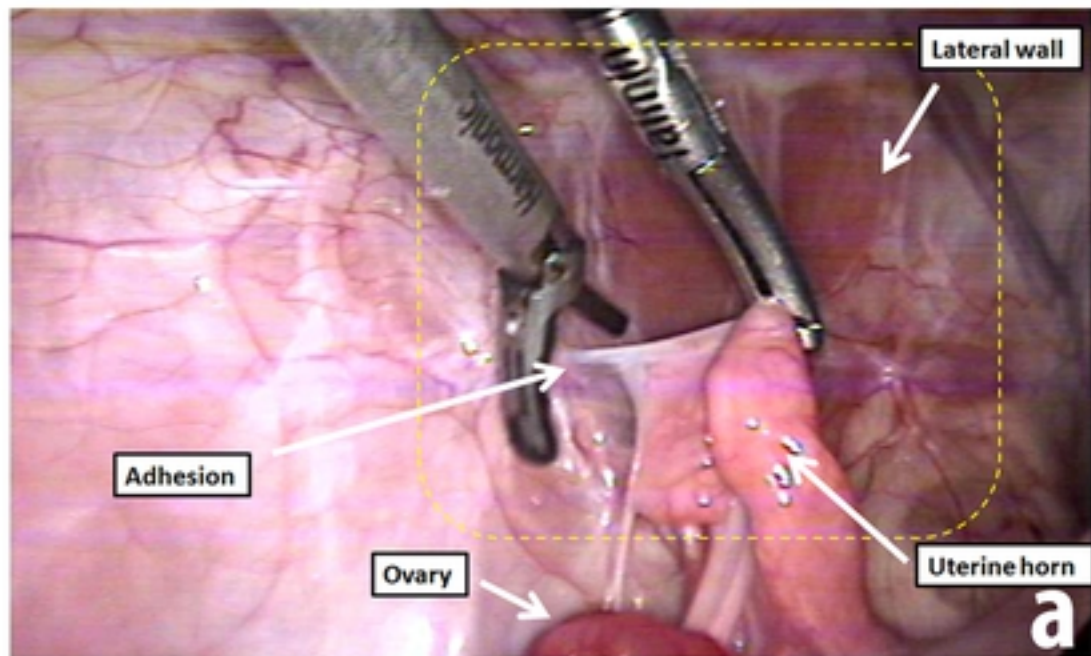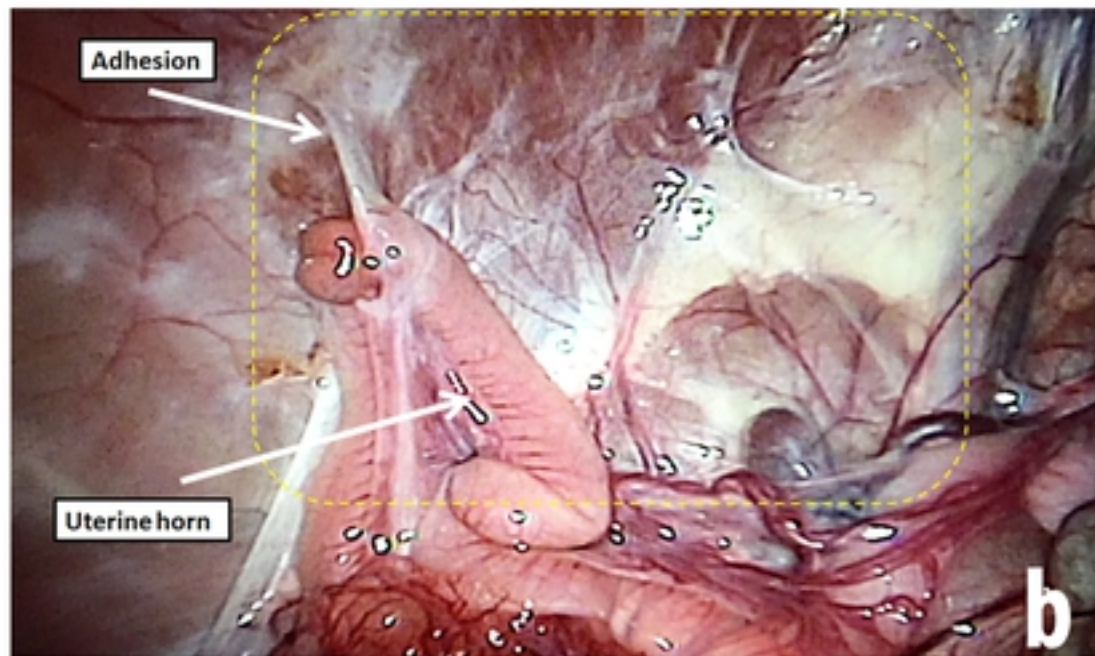

Figure 3

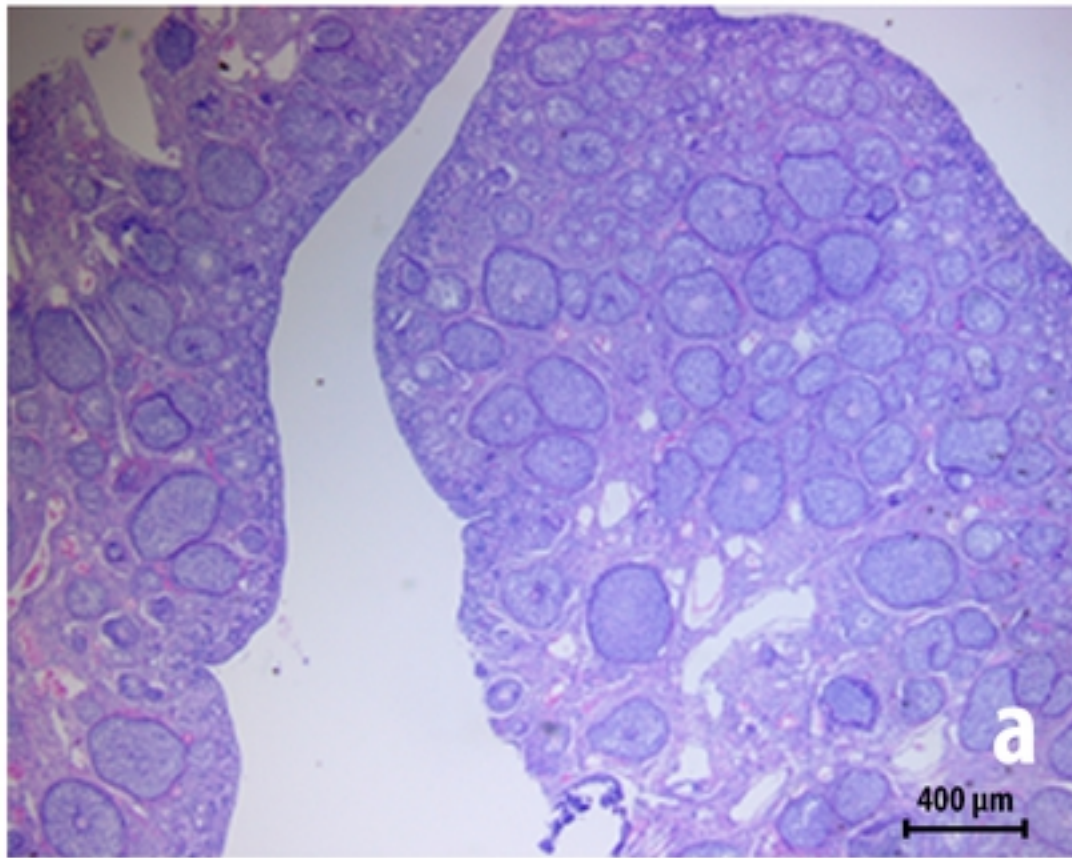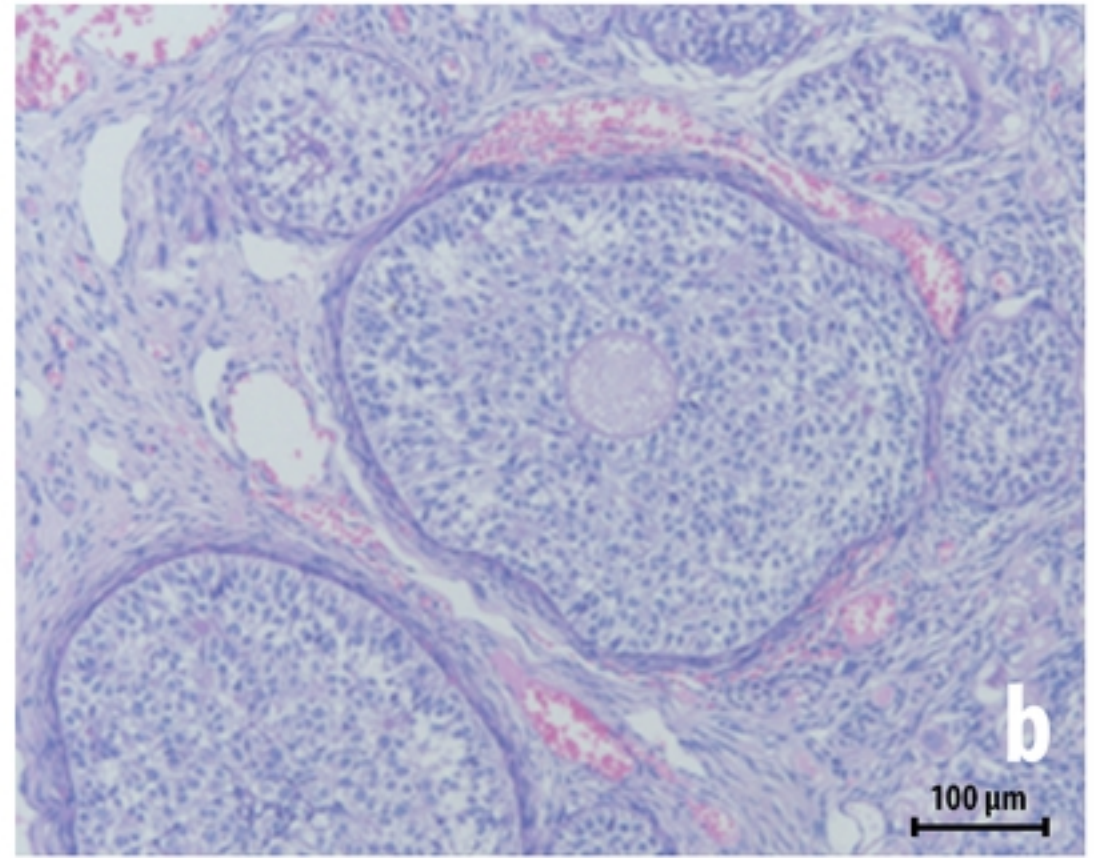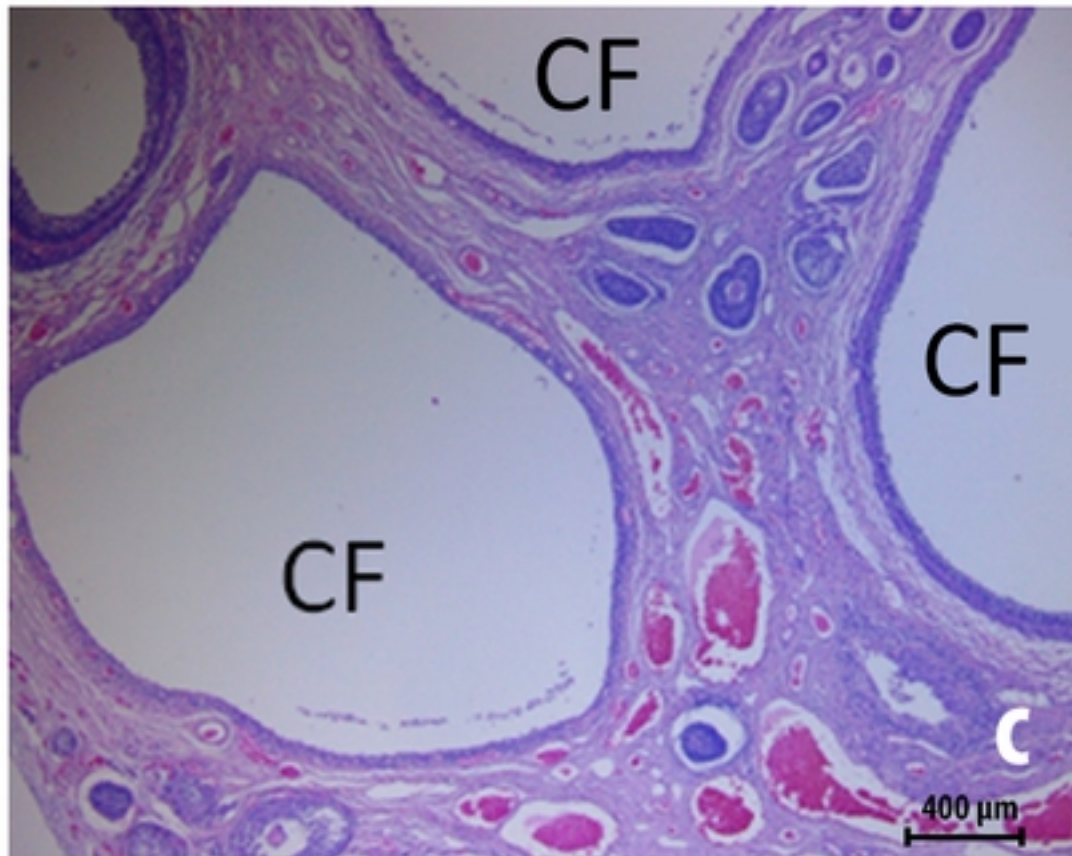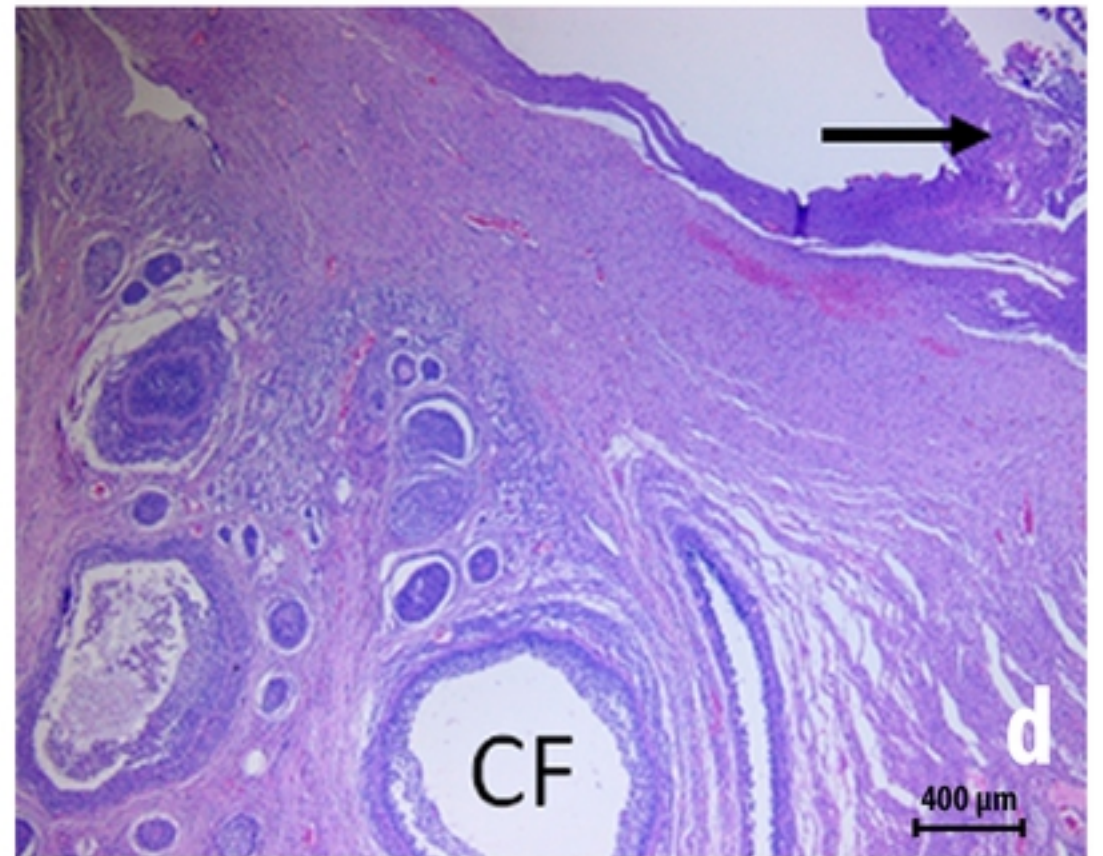

Figure 4

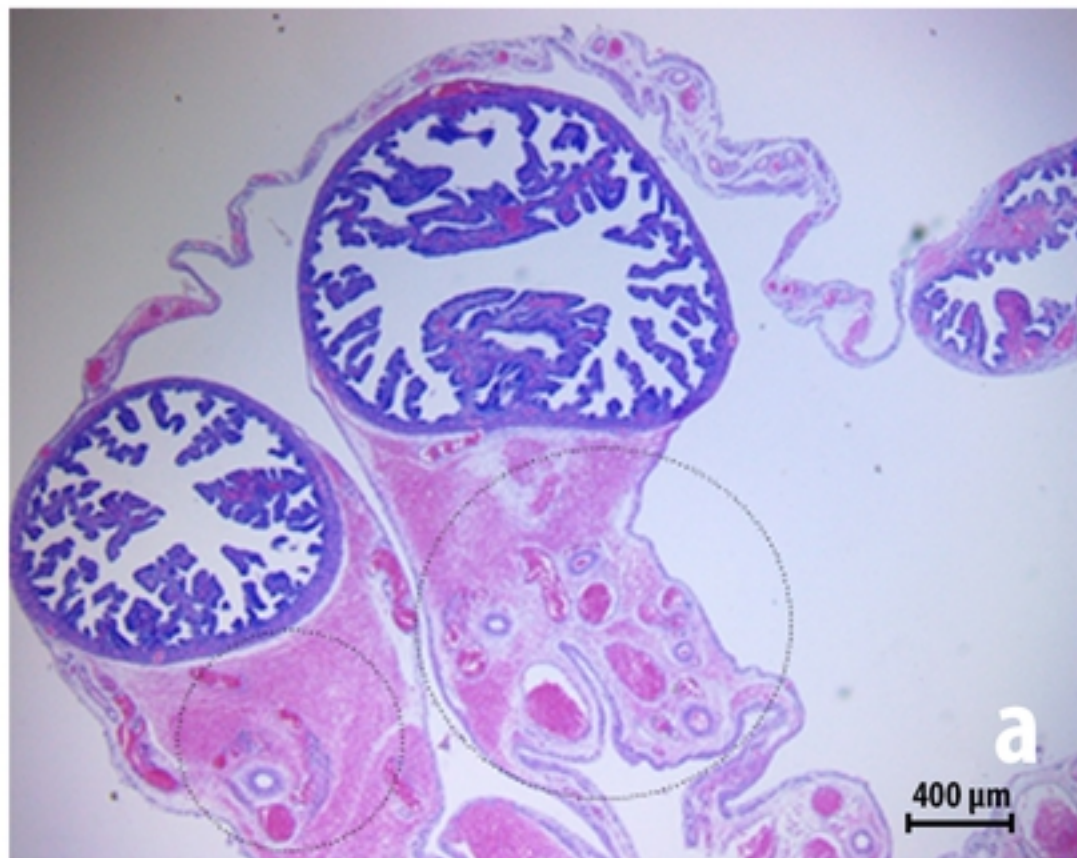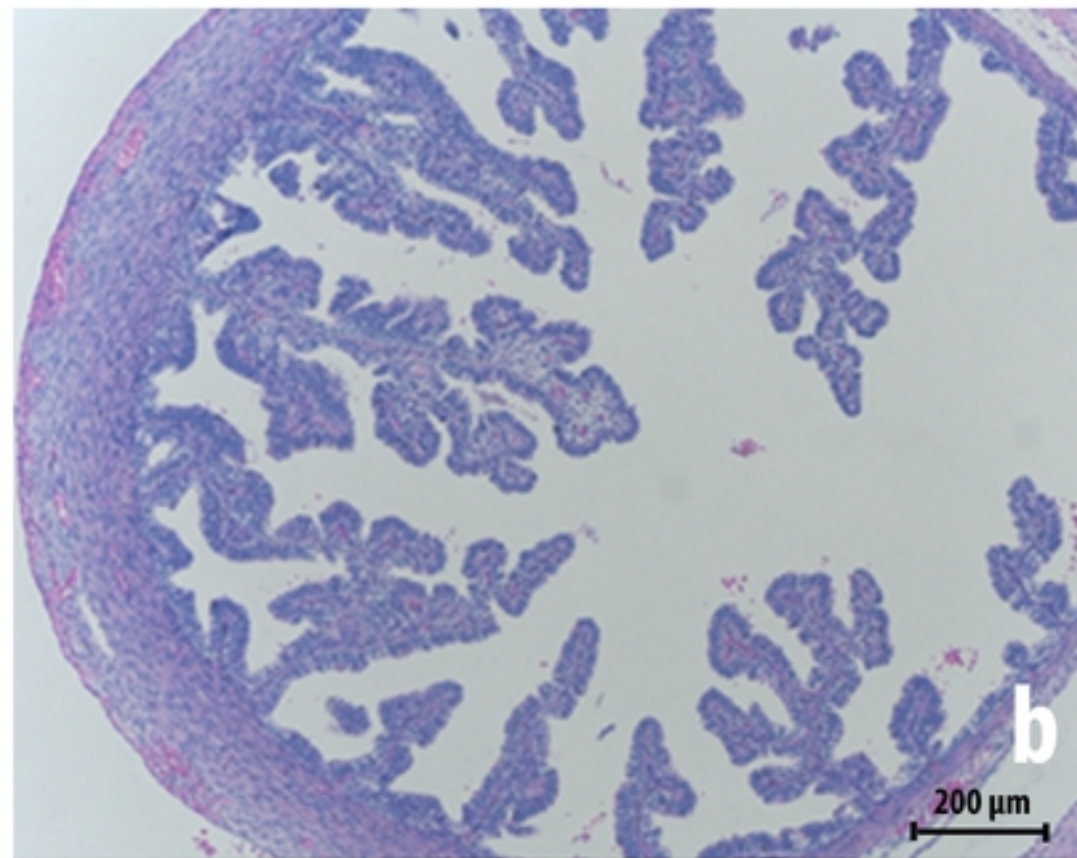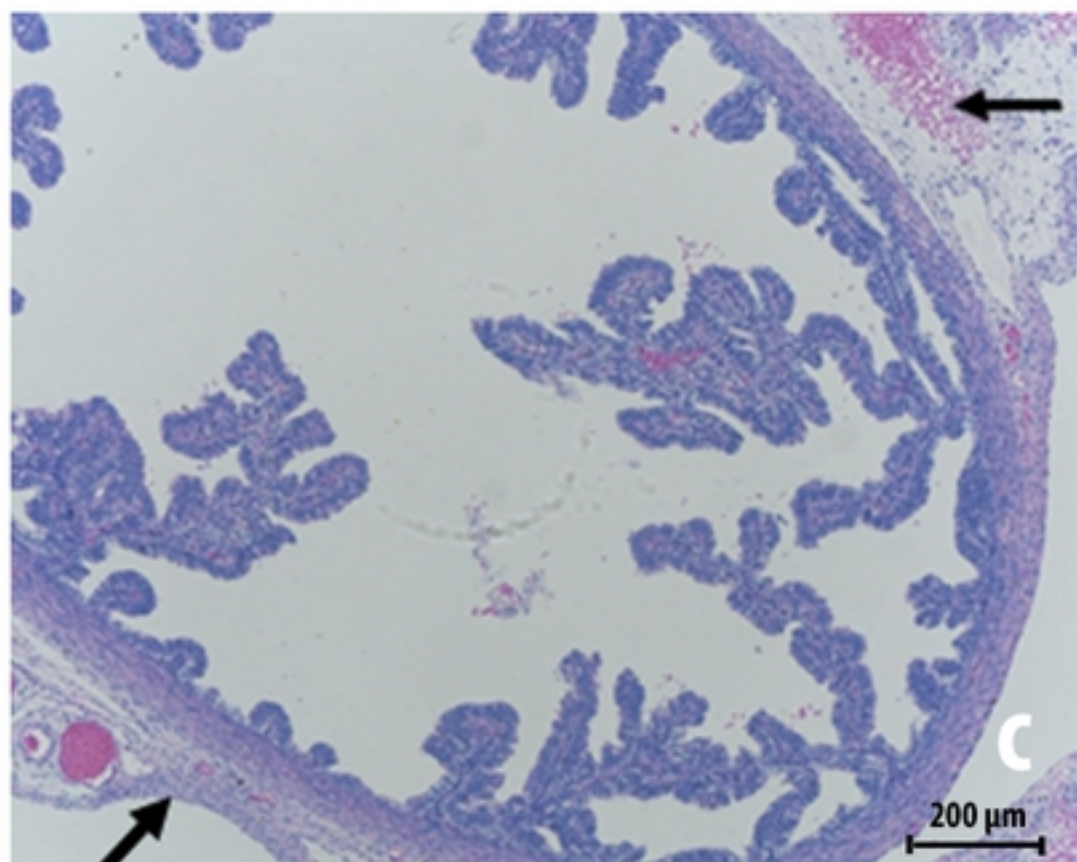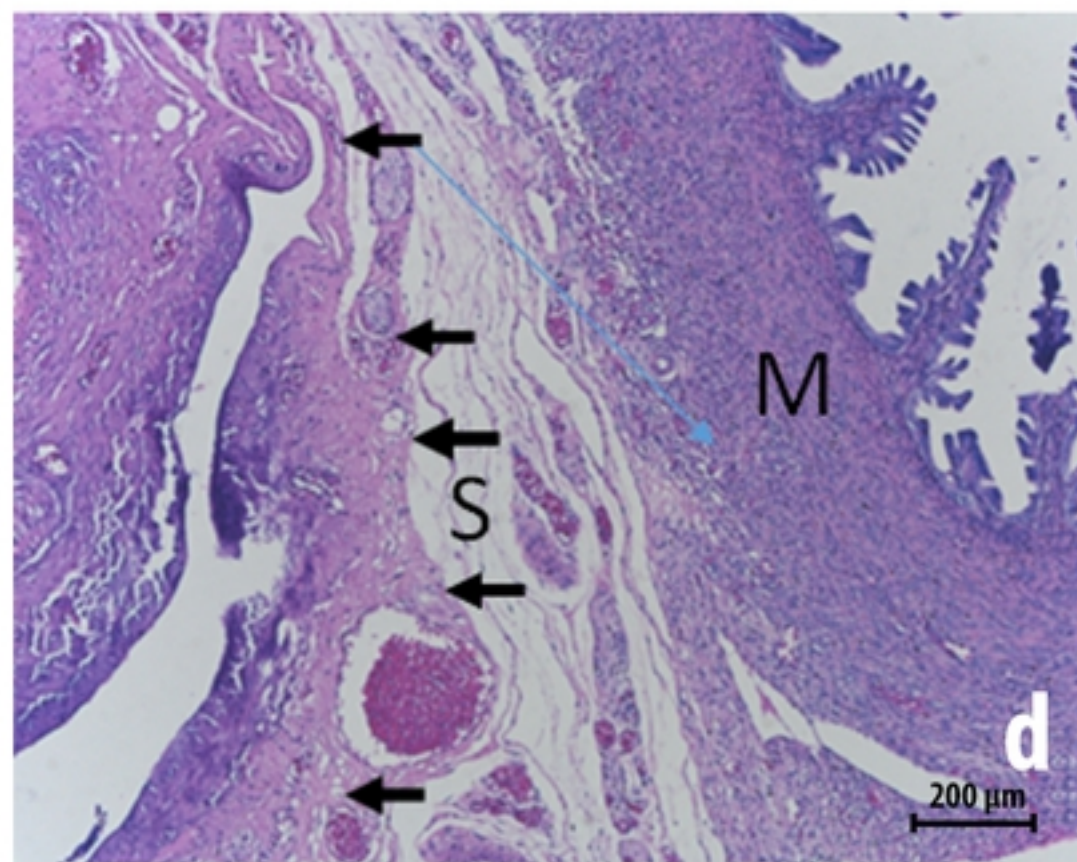

Figure 5

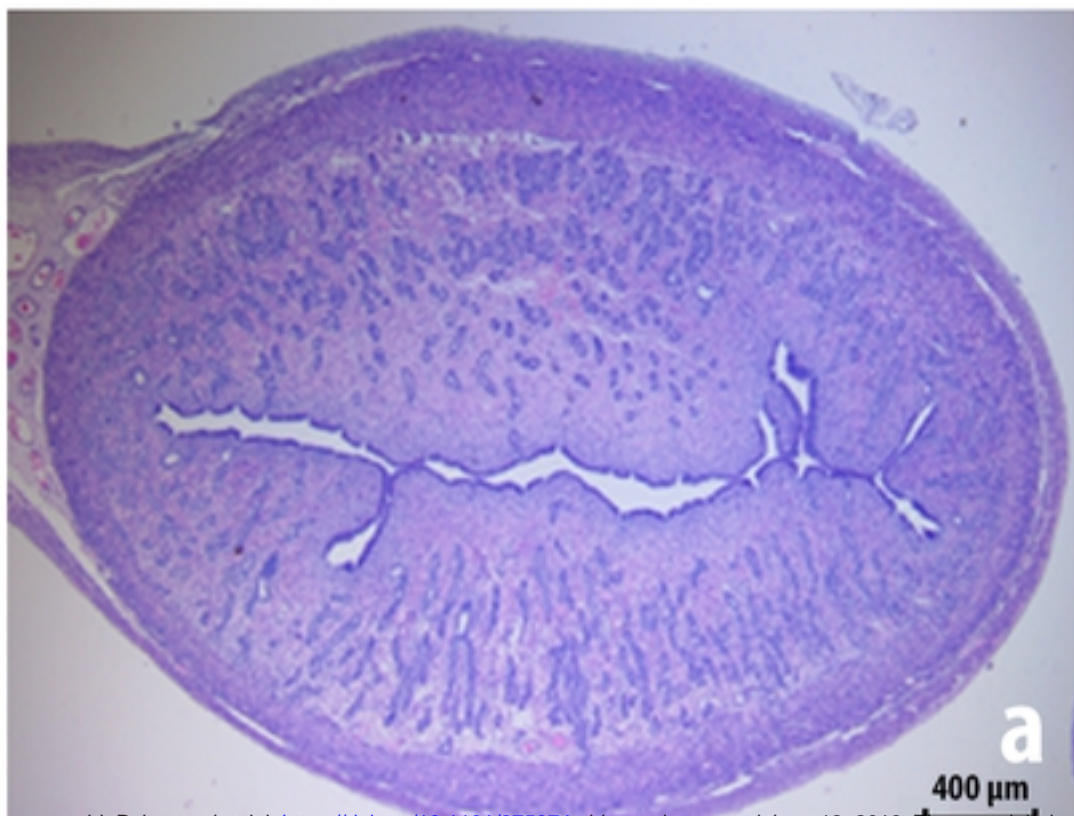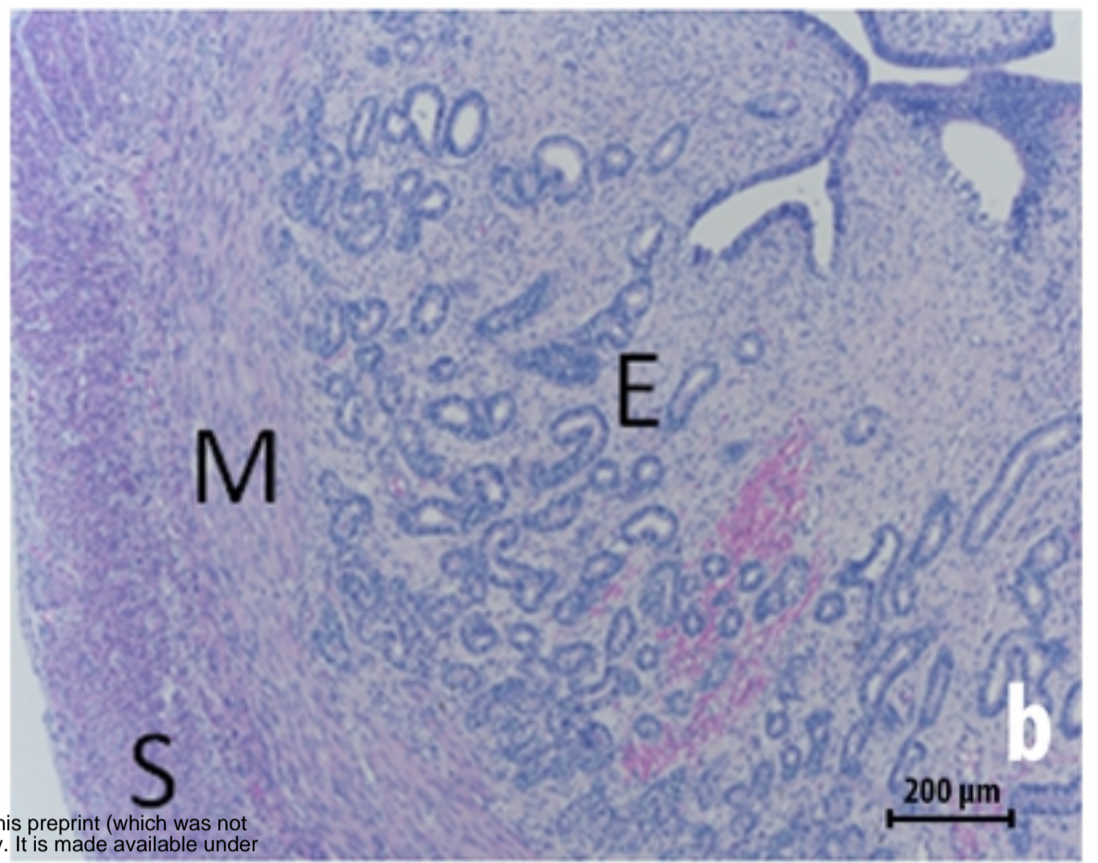

bioRxiv preprint doi: <https://doi.org/10.1101/675074>; this version posted June 18, 2019. The copyright holder for this preprint (which was not certified by peer review) is the author/funder, who has granted bioRxiv a license to display the preprint in perpetuity. It is made available under aCC-BY 4.0 International license.

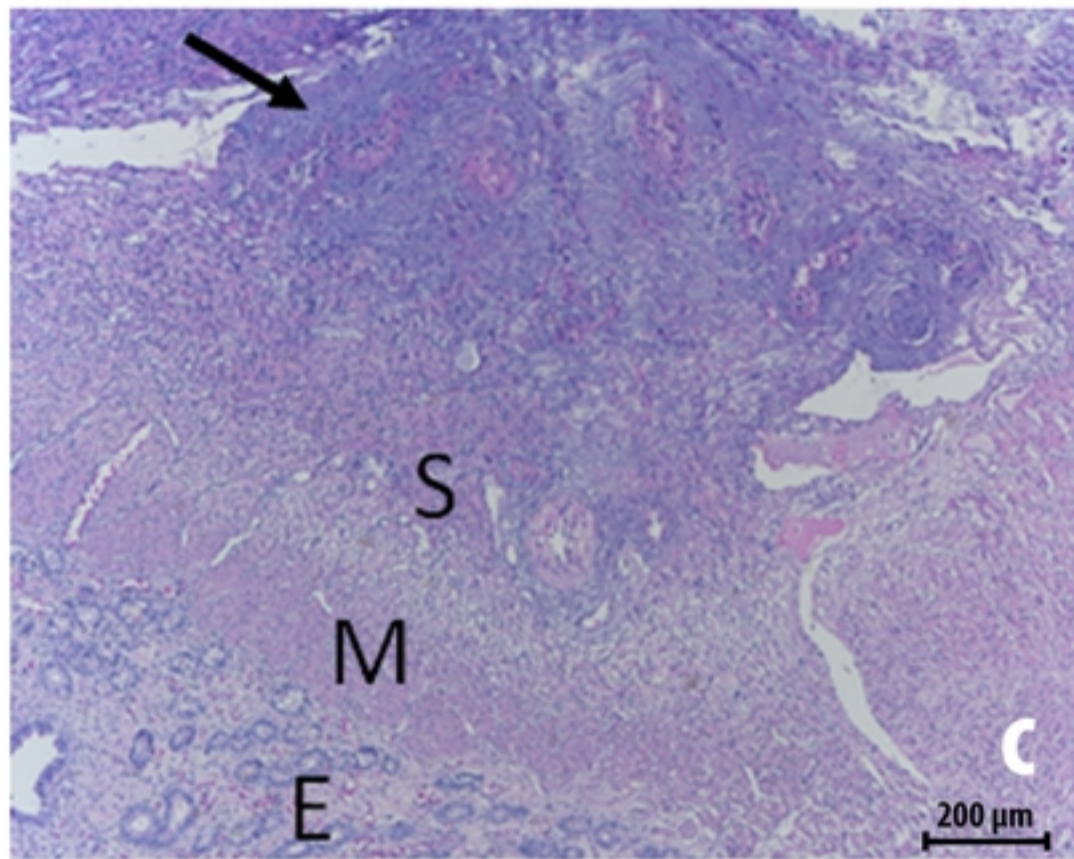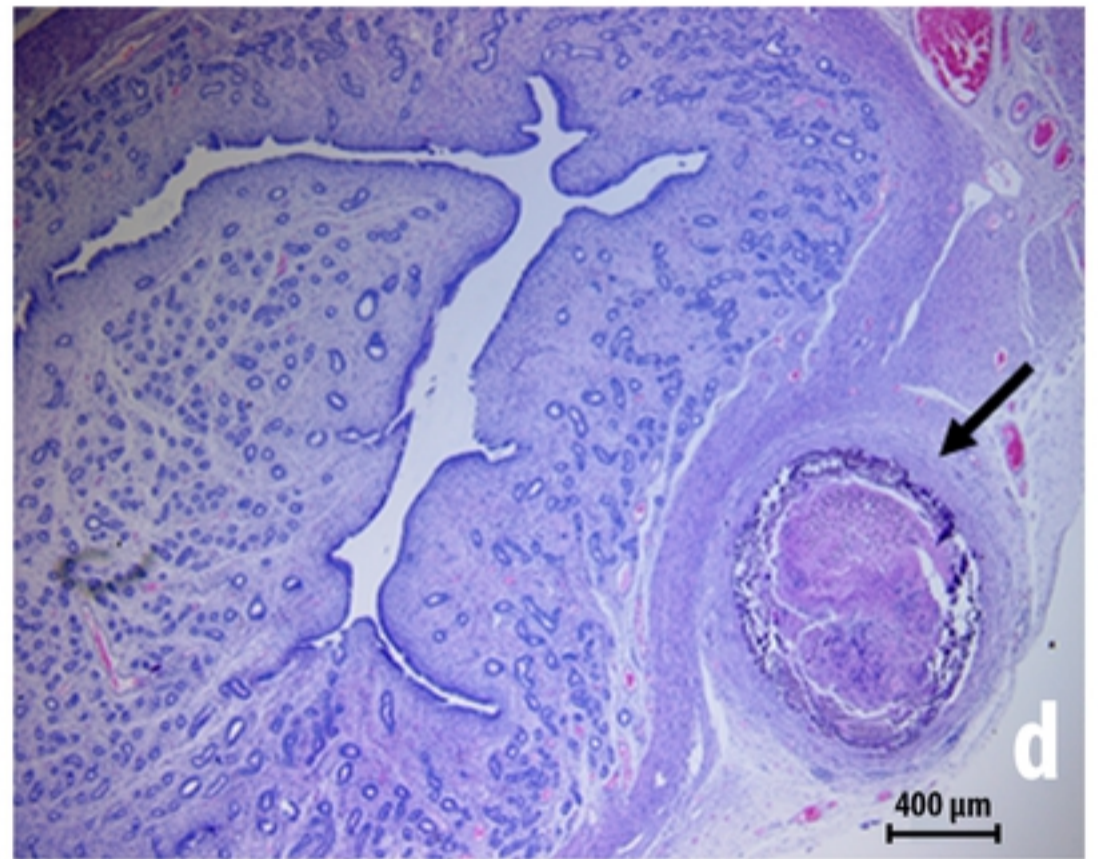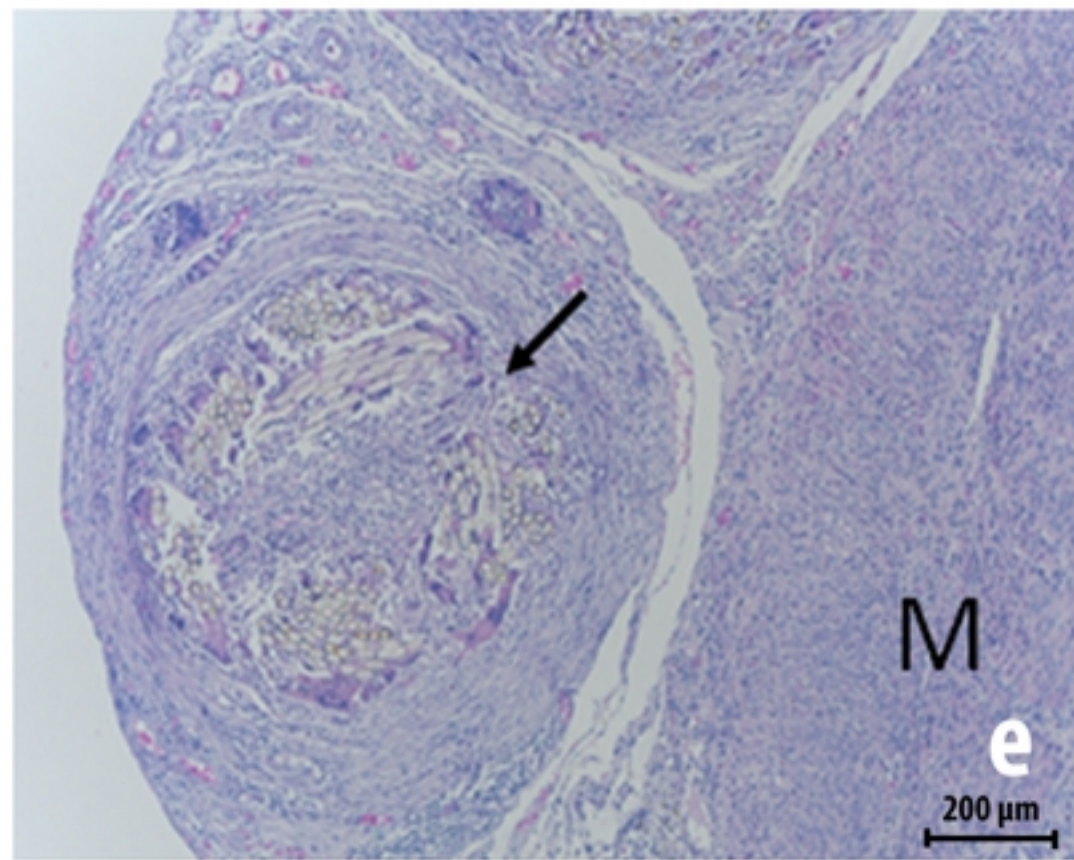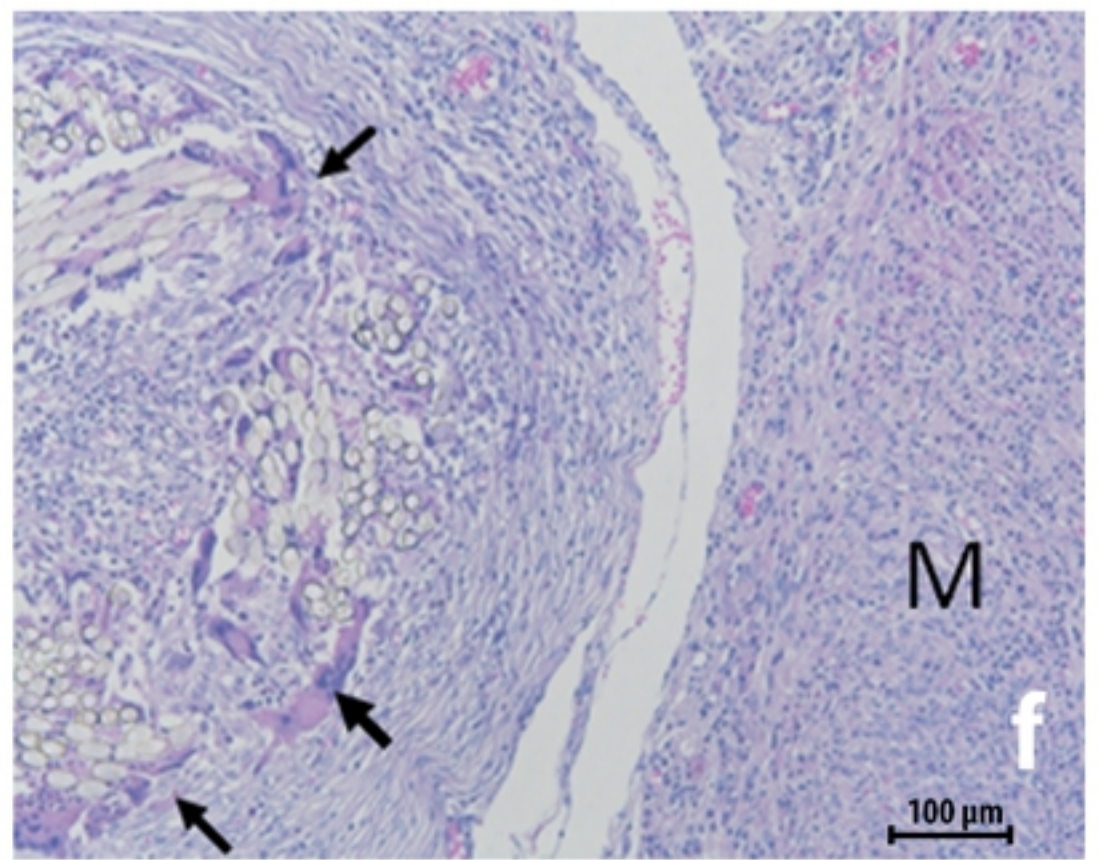

Figure 6
